1           **GLIS1 regulates trabecular meshwork function and intraocular**  
2           **pressure and is associated with glaucoma in humans**

3  
4           K. Saldas Nair #<sup>1,13</sup>, Chitragda Srivastava #<sup>2</sup>, Robert V. Brown #<sup>2</sup>, Swanand Koli <sup>3</sup>,  
5           Hélène Choquet <sup>4</sup>, Hong Soon Kang <sup>2</sup>, Yien-Ming Kuo <sup>3</sup>, Sara A. Grimm <sup>5</sup>, Caleb  
6           Sutherland <sup>2</sup>, Alexandra Badea <sup>6</sup>, G. Allan Johnson <sup>6</sup>, Yin Zhao <sup>3</sup>, Jie Yin <sup>4</sup>, Kyoko  
7           Okamoto <sup>2</sup>, Graham Clark <sup>7</sup>, Teresa Borrás <sup>8</sup>, Gulab Zode <sup>9</sup>, Krishnakumar Kizhatil <sup>7</sup>,  
8           Subhabrata Chakrabarti <sup>10</sup>, Simon W.M. John <sup>7,11</sup>, Eric Jorgenson <sup>12</sup>,  
9           Anton M. Jetten <sup>2,13\*</sup>

10  
11           <sup>1</sup> Department of Ophthalmology and Department of Anatomy  
12           School of Medicine, University of California, San Francisco  
13           San Francisco, CA 94143, USA

14           <sup>2</sup> Immunity, Inflammation and Disease Laboratory  
15           National Institute of Environmental Health Sciences  
16           National Institutes of Health  
17           Research Triangle Park, NC 27709, USA

18           <sup>3</sup> Department of Ophthalmology  
19           School of Medicine, University of California, San Francisco  
20           San Francisco, CA 94143, USA

21           <sup>4</sup> Kaiser Permanente Northern California  
22           Division of Research, Oakland, CA 94612, USA

23           <sup>5</sup> Integrative Bioinformatics Support Group  
24           National Institute of Environmental Health Sciences, National Institutes of Health  
25           Research Triangle Park, NC 27709, USA

26           <sup>6</sup> Center for In Vivo Microscopy  
27           Department of Radiology  
28           Duke University, Durham, NC 27710, USA

29           <sup>7</sup> The Jackson Laboratory, Bar Harbor, ME 04609, USA

30           <sup>8</sup> Department of Ophthalmology  
31           University of North Carolina School of Medicine  
32           Chapel Hill, NC 27599, USA

33           <sup>9</sup> Department of Pharmacology and Neuroscience  
34           North Texas Eye Research Institute  
35           University of North Texas Health Science Center, Fort Worth, TX 76107, USA

36           <sup>10</sup> Brien Holden Eye Research Centre  
37           L. V. Prasad Eye Institute, Hyderabad, India

38           <sup>11</sup> Howard Hughes Medical Institute, Mortimer B. Zuckerman Mind Brain Behavior Institute  
39           Department of Ophthalmology  
40           Columbia University, New York, NY 10027 USA

41           <sup>12</sup> Regeneron Pharmaceuticals, Inc.  
42           Tarrytown, NY 10591 USA

43           <sup>13</sup> These authors oversaw the project

44           # Contributed equally

45  
46           \*To whom correspondence should be addressed at [jetten@niehs.nih.gov](mailto:jetten@niehs.nih.gov)

49 **Abstract**

50

51 Chronically elevated intraocular pressure (IOP) is the major risk factor of primary open-  
52 angle glaucoma, a leading cause of blindness. Dysfunction of the trabecular meshwork  
53 (TM), which controls the outflow of aqueous humor (AqH) from the anterior chamber, is  
54 the major cause of elevated IOP. Here, we demonstrate that mice deficient in the Krüppel-  
55 like zinc finger transcriptional factor GLI-similar-1 (GLIS1) develop chronically elevated  
56 IOP. Magnetic resonance imaging and histopathological analysis reveal that deficiency in  
57 GLIS1 expression induces progressive degeneration of the TM, leading to inefficient AqH  
58 drainage from the anterior chamber and elevated IOP. Transcriptome and cistrome  
59 analyses identified several glaucoma- and extracellular matrix-associated genes as direct  
60 transcriptional targets of GLIS1. We also identified a significant association between  
61 *GLIS1* variant rs941125 and glaucoma in humans ( $P=4.73 \times 10^{-6}$ ), further supporting a role  
62 for *GLIS1* into glaucoma etiology. Our study identifies GLIS1 as a critical regulator of TM  
63 function and maintenance, AqH dynamics, and IOP.

64

65

66

## 67 **Introduction**

68  
69 Glaucoma is a heterogeneous group of progressive optic neuropathies characterized by  
70 the degeneration of the optic nerve that results in irreversible blindness<sup>1</sup>. Primary open-  
71 angle glaucoma (POAG) and primary angle closure glaucoma (PACG) are the two most  
72 common forms of glaucoma in adults<sup>2,3,4,5</sup>, while primary congenital glaucoma (PCG)  
73 accounts for up to 18% of childhood blindness<sup>6</sup>. Age, ethnicity, gender, environmental  
74 and genetic factors all contribute to glaucoma susceptibility<sup>7,8,9</sup>. However, elevated  
75 intraocular pressure (IOP) is the major causal risk factor for glaucoma.

76 Normal IOP is required to maintain proper physiological function of the eye and also  
77 to maintain the structure of the globe of the eye. The maintenance of homeostatic IOP is  
78 critically dependent on the balance between the inflow and outflow of aqueous humor  
79 (AqH)<sup>10</sup>. AqH is secreted by the ciliary body into the ocular anterior chamber (AC) where  
80 it nourishes avascular tissues. The AqH subsequently exits through specialized drainage  
81 structures located at the junction where the iris meets the cornea (iridocorneal angle).  
82 The ocular drainage structures are primarily composed of the trabecular meshwork (TM)  
83 and Schlemm's canal (SC). AqH first flows through the TM into the SC and subsequently  
84 enters the episcleral veins before returning back to the systemic circulation<sup>10,11,12</sup>. TM  
85 dysfunction has been causally linked to impaired AqH drainage (increased outflow  
86 resistance) and elevated IOP<sup>10,13,14,15</sup>.

87 An increasing number of rare mutations and common genetic variants in a variety of  
88 genes, including *MYOC*, *CYP1B1*, *GLIS3*, *LOXL4*, *LTBP2*, *PITX2*, and *OPTN*, have been  
89 associated with elevated IOP and different types of glaucoma<sup>4,5,9,16,17,18,19,20,21,22,23,24</sup>.

90 GLI-Similar 1 (GLIS1), together with GLIS2 and -3, comprise a subfamily of Krüppel-  
91 like zinc finger (ZF) transcriptional factors<sup>25,26,27</sup>. In contrast to GLIS2 and GLIS3,  
92 relatively little is known about the physiological functions of GLIS1. To obtain greater  
93 insights into the biological roles of GLIS1, we analyzed *Glis1*-KO mice for phenotypic  
94 alterations and found that these mice develop an enlarged eye phenotype.

95 In this study, we examine the function of GLIS1 in ocular tissues in more detail and  
96 demonstrate that GLIS1 plays a critical regulatory role in maintaining normal TM structure  
97 and IOP. We show that GLIS1 is expressed in the TM, a tissue critical in the regulation of  
98 outflow resistance. Deficiency in *GLIS1* induces progressive degeneration of the TM,  
99 leading to inefficient AqH drainage and elevated IOP. To obtain insights into potential  
100 mechanisms that may underlie this phenotype, changes in the expression of target genes  
101 were examined. Combined RNA-Seq and ChIP-Seq analyses identified a number of  
102 genes that are directly regulated by GLIS1, including *MYOC*, *CYP1B1*, *LOXL4*, and  
103 *LTBP2*, genes previously implicated in glaucoma<sup>6,28</sup>. Importantly, we have detected  
104 significant associations between common genetic variants in the *GLIS1* region and POAG  
105 in humans, thereby supporting the role of *GLIS1* as a glaucoma risk gene. These variants  
106 may impact TM functions and compromise AqH drainage thereby contributing to elevated  
107 IOP and glaucoma.

108

109

110



## 111 **Results**

112

### 113 **Identification of GLIS1 physiological functions**

114 To obtain insights into the physiological functions of GLIS1<sup>29,30</sup>, *Glis1*-KO mice were  
115 examined for any potential phenotypic alterations. In these mice most of exon 4 (840 bp)  
116 was replaced by lacZ containing three Stop codons (lacZ-Stop<sub>3</sub>) generating a fusion  
117 protein (GLIS1N-βGal) consisting of the N-terminus of GLIS1 and β-galactosidase (β-  
118 Gal). This protein lacks the entire DNA-binding domain (DBD) and C-terminus of GLIS1,  
119 including its transactivation domain (TAD)(Supplementary Figure 1a). The fusion protein  
120 was undetectable by immunohistochemical staining for β-Gal (1:1000, PR-Z3781,  
121 Promega) in several tissues suggesting that it may be proteolytically degraded. Reporter  
122 transactivation analysis demonstrated that mutations in the ZF motifs that abolish their  
123 tetrahedral configuration, and deletion of the C-terminal TAD greatly decreased or fully  
124 abolished GLIS1 transcriptional activity (Supplementary Figure 1b). These data indicate  
125 that loss of the ZFs and TAD in *Glis1*-KO mice abolish the ability of GLIS1 to recognize  
126 the GLIS binding site (GLISBS) and to regulate the transcription of target genes.  
127 Supporting the specificity of the *Glis1*-KO, deletion of exon 4 had no significant effect on  
128 the expression of *Dmrtb1*, *Slc1a7*, *Dio1*, and *Cpt2*, genes neighboring *Glis1*, nor the  
129 expression of *Glis2* and *Glis3* in *Glis1*-KO kidneys and testes (Supplementary Figure 1c  
130 and d).

131 Evaluation of 1-6 months C57BL/6NCrl *Glis1*-KO mice revealed that these mice  
132 developed enlarged eyes (Figure 1a), while no other obvious abnormalities were  
133 observed. Similarly, no eye enlargement was observed in 129S6/SvEvTac *Glis1*-KO  
134 mice. Male and female KO mice in both backgrounds noticeably developed this abnormal

135 eye phenotype between 2-3 months of age, which became more pronounced with age.  
136 Because protruding eyes are a well-established comorbidity commonly associated with  
137 Graves' disease, an autoimmune disease leading to hyperthyroidism<sup>31</sup>, and since GLIS1  
138 and GLIS3 family members have been implicated in several thyroid gland-associated  
139 diseases<sup>25,27,32,33</sup>, we examined whether this *Glis1*-KO phenotype was related to the  
140 development of Graves' disease that is characterized by high circulating levels of T3/T4  
141 and low TSH. However, our analysis of serum T3, T4 and TSH showed that their levels  
142 were not significantly different between WT and *Glis1*-KO C57BL/6NCrl mice indicating  
143 that this phenotype was not related to the development of Graves' disease  
144 (Supplementary Figure 2).

145

#### 146 **Intraocular Pressure is elevated in *Glis1*-KO mice**

147 To examine whether the enlarged eye phenotype was associated with anatomic changes  
148 in intra- and periocular tissues, we performed Gadolinium magnetic resonance imaging  
149 (Gd-MRI) on formalin fixed specimen from 2.5-months-old WT and *Glis1*-KO  
150 C57BL/6NCrl mice. The contrast agent Gd has been used to assess ocular anatomy by  
151 MRI<sup>34,35</sup>. Analysis of multiple MRI images through the head revealed that there was little  
152 difference between the size of the periocular tissues in *Glis1*-KO relative to WT littermates  
153 in all 3 orientations. Importantly, we consistently observed an enlargement of the AC in  
154 both the right and left eyes of the *Glis1*-KO mice (Figure 1a). The enlargement of AC  
155 observed in the *Glis1*-KO mice might be due to defective AqH drainage causing increased  
156 AqH accumulation that leads to the observed elevated IOP.

157 To obtain further support for this hypothesis, we measured IOP in WT and *Glis1*-KO  
158 mice over a 12-month time period. Our data demonstrated that IOP is significantly  
159 elevated in male as well as female *Glis1*-KO mice relative to age and gender matched  
160 WT littermates (Figure 1b, c). An increase in IOP was observed as early as in 1-month-  
161 old mice and then steadily increased before plateauing at 8 months. Further analysis  
162 revealed that the progressive, age-dependent increase in IOP was similar between left  
163 and right eyes (Supplementary Figure 3). Together, these observations suggested a role  
164 for GLIS1 in the regulation of IOP.

165

#### 166 **Decreased AqH outflow in eyes from GLIS1-deficient mice**

167 Elevated IOP is most commonly caused by outflow resistance. To determine whether the  
168 elevated IOP in *Glis1*-KO C57BL/6NCrl mice was due to changes in AqH drainage, we  
169 employed dynamic contrast enhanced MRI to evaluate AqH dynamics *in vivo*. The  
170 contrast agent Gd present in the AC enhances the T1-weighted MRI signal brightness  
171 and serves as a tracer, thereby providing a readout for AqH accumulation and outflow<sup>34,35</sup>.  
172 Following administration of Gd, 2 months-old mice were scanned for 2 h at 10 min  
173 intervals and Gd accumulation in the anterior chamber was measured relative to the initial  
174 baseline (See [image source files at:](https://civmvoxport.vm.duke.edu/voxbase/studyhome.php?studyid=733)  
175 <https://civmvoxport.vm.duke.edu/voxbase/studyhome.php?studyid=733>). Our data  
176 indicated that in WT mice Gd is readily cleared from the eye (Figure 1d). A significant  
177 (29%;  $P < 0.0001$ ) increase in Gd accumulation in the anterior chamber was detected in  
178 *Glis1*-KO eyes as compared to the WT eyes suggesting impaired AqH exit. It is well-  
179 established that a major route of AqH exit from the anterior chamber is via the

180 conventional drainage pathway comprising the TM and SC<sup>10</sup>. To obtain further support  
181 for this hypothesis, we evaluated the AqH dynamics in *Glis1*-KO mice following topical  
182 administration (5  $\mu$ l, 0.4%) of Ripasudil. This drug functions as an IOP lowering Rho-  
183 kinase inhibitor that enhances AqH outflow via the TM and SC<sup>36</sup>. As shown in Figure 1d,  
184 Ripasudil treatment significantly reduced Gd accumulation in the ocular anterior chamber  
185 of *Glis1*-KO mice as compared to treatment with isotonic saline in the contralateral eye  
186 consistent with its IOP lowering effects. Our data suggests that the increased IOP  
187 observed in the *Glis1*-KO mice correlates with reduced AqH outflow and might involve  
188 dysfunction of the TM, a major cause of elevated IOP and glaucoma.

189

#### 190 **Progressive disruption of ocular drainage structures in *Glis1*-KO mice**

191 To determine whether structural and morphological changes of ocular drainage tissues in  
192 *Glis1*-KO mice might underlie TM dysfunction and elevated IOP, we performed a detailed  
193 ocular histological examination of WT, *Glis1*-heterozygous and *Glis1*-KO mice maintained  
194 in a C57BL/6NCrl strain. Ocular angle structures of the *Glis1*-heterozygous mice showed  
195 an intact ocular drainage tissue, unlike the *Glis1*-KO that exhibited TM degeneration  
196 (Supplementary Figure 4a and b). This lack of phenotype in heterozygous mice is  
197 consistent with that these mice did not develop elevated IOP (Supplementary Figure 4c).  
198 Histological analyses demonstrated that the angle structures of the *Glis1*-KO eyes initially  
199 appear normal. At 3 weeks, no significant difference in TM morphology was observed  
200 suggesting that GLIS1 has no major effect on TM development (Figure 2a, b;  
201 Supplementary Figure 5). Major phenotypic changes are observed by 6-8 weeks of age  
202 (Figure 2c-f). Focal regions of the angles in 6-weeks old *Glis1*-KO mice exhibited thinning

203 of the TM (hypoplasia) in a substantial proportion of mutant eyes (Figure 2d;  
204 Supplementary Figure 6), while some local regions lacked discernible TM. Based on  
205 histology, the damage to the ocular drainage structure within an eye is quite variable at  
206 earlier time points (6 weeks) with some regions appearing much more normal. Such local  
207 variability is well documented for other glaucoma genes and may partially explain the  
208 relatively modest increase in IOP<sup>37,38</sup>.

209 The loss of GLIS1 function did not affect gross morphology of the SC at an early time  
210 point (4 weeks) (Supplementary Figure 7a, b) when the TM is still largely intact. However,  
211 at later ages (6 weeks and older), but more common at 3 months and older ages, there  
212 are regions where the SC becomes partially or completely collapsed (Figure 2e-f). This  
213 might be due to a regional or complete degeneration of the TM that may protect the SC  
214 from collapse. At older ages (over 6 months), in addition to the degeneration of the TM  
215 and collapse of the ocular drainage structures, *Glis1*-KO eyes exhibited anterior  
216 synechiae characterized by fusion of the iris and cornea causing angle closure  
217 (Supplementary Figure 8a). Besides the observed defects in the ocular drainage  
218 structures, no gross abnormalities were observed in other ocular tissues (Supplementary  
219 Figure 7c and 8b). We also characterized the ocular angle of *Glis1*-KO mice maintained  
220 in a 129S6/SvEvTac background. These mice exhibited thinning of the TM layer like that  
221 observed in the C57BL/6NCrl background (Supplementary Figure 9). Our data suggest  
222 that GLIS1 deficiency leads to progressive TM dysfunction and TM degeneration.

223

224 **GLIS1 is highly expressed in TM cells**

225 Since the TM plays a major role in the regulation of AqH drainage and IOP, we decided  
226 to focus our study on the analysis of the TM. To examine whether the observed changes  
227 in the TM might be intrinsic to the loss of *GLIS1* expression in this tissue, we analyzed  
228 *GLIS1* expression in human TM (HTM) tissue and primary HTM cells. The human *GLIS1*  
229 gene and its mouse orthologue can generate two transcripts, long and short (referred to  
230 as *GLIS1<sub>L</sub>* and *GLIS1<sub>S</sub>*) that generate a 795 or a 620 amino acids protein, respectively (a  
231 789 and 620 amino acid protein in mice)  
232 ([https://useast.ensembl.org/Homo\\_sapiens/Gene/Summary?db=core;g=ENSG00000174332;r=1:53506237-53738106](https://useast.ensembl.org/Homo_sapiens/Gene/Summary?db=core;g=ENSG00000174332;r=1:53506237-53738106)). QPCR analysis demonstrated that *GLIS1<sub>L</sub>* was the  
233 primary transcript in primary HTM cells, and all human tissues tested (Supplementary  
234 Figure 10), whereas *GLIS1<sub>S</sub>* was expressed at very low levels. In isolated HTM,  
235 characterized by their high myocilin (MYOC) expression, *GLIS1* mRNA was expressed at  
236 levels comparable to that of kidney, a tissue in which *GLIS1* is highly expressed<sup>29</sup>(Figure  
237 3a). QPCR analysis further showed that *GLIS1* mRNA was highly expressed in mouse  
238 ocular tissue enriched in the TM, moderately in the ciliary body, and at very low levels in  
239 the cornea and retina (Figure 3b). *In situ* RNA localization by RNAscope supported the  
240 expression of *Glis1* transcripts in the TM and ciliary body isolated from 3 months old WT  
241 mice (Figure 3c), whereas *Glis1* transcripts were not detectable in the iris and cornea.  
242 These data indicated that *GLIS1* expression is intrinsic to TM cells and suggests that the  
243 TM dysfunction observed in *Glis1*-KO mice is likely causally related to the loss of *GLIS1*  
244 transcription activation function in these cells. In contrast to TM, the ciliary body, which  
245 also expressed *Glis1*, exhibited a properly organized epithelial layer (Supplementary  
246 Figure 7c).

248

## 249 **Regulation of gene expression by GLIS1 in primary human TM cells**

250 GLIS1 regulates gene transcription by binding to GLIS binding sites (GLISBS) in the  
251 promoter regulatory region of target genes<sup>25,26</sup>. To investigate alterations in gene  
252 expression that might underlie the phenotypic changes observed in TM cells, we  
253 performed RNA-Seq and ChIP-Seq analyses. Transcriptome analysis was performed  
254 with HTM(shGLIS1) cells, in which GLIS1 expression was knocked down by GLIS1  
255 shRNA lentivirus, and with control cells (HTM(Scr)) infected with scrambled shRNA  
256 lentivirus. The volcano plot in Figure 4a shows the distribution of down- and up-regulated  
257 genes in HTM(shGLIS1) cells in comparison to HTM(Scr) cells. In addition to down-  
258 regulation of GLIS1 mRNA, the expression of several genes associated with TM functions  
259 was decreased in HTM(shGLIS1) cells, including *MYOC*, *CHI3L1*, *SPARC*, *CYP1B1*, and  
260 *APOD*<sup>39,40,41</sup>(Figure 4a, b; Supplementary Table 2). In addition, the expression of a variety  
261 of genes encoding extracellular matrix components was reduced in HTM(shGLIS1) cells,  
262 including a number of collagen genes (e.g., *COL1A2*, *COL6A2*, *COL4A1/2*), fibulins  
263 (*FBLN1*, *FBLN5*), microfibril-related genes (*FBN2*, *LOXL1-4*, *LTBP2*), matrix  
264 metalloproteinases (*ADAMTS10*, *MMP2*), and genes involved in cell-cell and cell-ECM  
265 adhesion (e.g., *ITGA3*) (Figure 4a, b; Supplementary Table 2)<sup>42</sup>. In addition, the  
266 expression of a number of genes was up-regulated, including *EFEMP1* and *RTN4*.  
267 QPCR-analysis confirmed the decrease in *MYOC*, *BMP2*, *LOXL4*, *APOD*, *LTBP2*, and  
268 *CYP1B1* mRNA expression in HTM(shGLIS1) cells (Figure 4e and Supplementary Figure  
269 11). Several of the differentially expressed genes have previously been reported to be

270 associated with elevated IOP and/or glaucoma, including *MYOC*, *ADAMTS10*, *LTBP2*,  
271 *LOXL1*, *TGFBR3*, *CYP1B1*, and *EFEMP1*<sup>5,28,43,44,45</sup>.

272 The regulation of many of these genes by GLIS1 was further supported by gene  
273 expression analysis in TM cells overexpressing GLIS1. For this analysis we used  
274 HTM(pIND-GLIS1) transiently expressing Dox-inducible Flag-GLIS1-HA and TM5(pIND-  
275 GLIS1), stably expressing a Dox-inducible Flag-GLIS1-HA. Dox treatment greatly  
276 induced GLIS1 mRNA expression in TM5(pIND-GLIS1) cells and accumulation of Flag-  
277 GLIS1-HA protein in the nucleus (Figure 4f; Supplementary Figure 12). Transcriptome  
278 analysis showed that induction of GLIS1 expression in Dox-treated HTM(pIND-GLIS1)  
279 and TM5(pIND-GLIS1) cells enhanced the expression of many, but not all, of the same  
280 genes that were down-regulated by shGLIS1 RNAs in HTM cells (Figure 4a, c, d;  
281 Supplementary Table 2). QRT-PCR analysis showed that the decreased expression of  
282 *MYOC*, *BMP2*, *LOXL4*, *APOD*, and *LTBP2* in HTM(shGLIS1) correlated with increased  
283 expression in Dox-treated TM5(pIND-GLIS1) cells (Figure 4e and f). Similarly, the  
284 induction of *CYP1B1* mRNA in HTM(pIND-GLIS1) cells correlated with decreased  
285 expression in HTM(shGLIS1) (Supplementary Figure 11). As indicated above, decreased  
286 expression in HTM(shGLIS1) did not always perfectly correlate with increased expression  
287 in HTM(pIND-GLIS1) and/or TM5(pIND-GLIS1) cells (Supplementary Table 2). Such  
288 differences might, among other things, be due to variations in the epigenome and the  
289 transcription regulatory machinery between primary and immortalized TM cells or different  
290 efficiencies of the shGLIS1 used. It might further relate to differences in the expression  
291 levels of endogenous GLIS1 or that of GLIS1 target genes in HTM versus TM5 cells or  
292 variations in the binding affinity of GLIS1 to GLIS binding sites of target genes.



293 To determine which of the differentially expressed genes were direct transcriptional  
294 targets (cistrome) of GLIS1, we performed ChIP-Seq analysis. Since no suitable GLIS1  
295 antibody was available for ChIP-Seq and it was not feasible to establish primary HTM  
296 cells stably expressing GLIS1, hence we utilized the TM5(pIND-GLIS1) cells. ChIP-Seq  
297 analysis to identify direct transcriptional targets of GLIS1 showed an enrichment for  
298 GLIS1 binding (Figure 5a). ChIP-Seq analysis identified a total of 46,947 distinct GLIS1  
299 binding peaks in Dox-treated TM5(pIND-GLIS1) cells. About 10% of GLIS1 binding peaks  
300 were within proximal promoter regions 1 kb upstream of transcription start sites (TSSs),  
301 whereas 16% were further upstream (Figure 5b). GLIS1 binding was most highly enriched  
302 at introns within the gene body as we reported for GLIS3<sup>32,46</sup>. Homer *de novo* and known  
303 motif analyses identified a G/C-rich GLISBS-like consensus sequences as the top motifs  
304 (Figure 5c). This sequence was very similar to the consensus GLISBS reported  
305 previously<sup>32,46,47</sup>, indicating that our ChIP-Seq was successful in detecting specific GLIS1  
306 binding sequences. Our GLIS1 ChIP-Seq analysis identified a number of additional  
307 motifs, including motifs for bZIP transcription factors (e.g., ATF3, FRA1, BATF, and  
308 JUNB, members of the AP-1 complex), forkhead box (FOX) proteins<sup>48</sup>, and TEA domain  
309 transcription factors (TEAD) that play a key role in the Hippo pathway<sup>49</sup>. These data  
310 suggested co-localization of the GLIS1 binding consensus with motifs for other  
311 transcription factors that have been previously implicated in the regulation of TM and  
312 glaucoma<sup>45,50,51</sup>. These findings are consistent with the hypothesis that GLIS1 regulates  
313 TM gene transcription in coordination with other transcription factors.

314 Analysis of the combined RNA-Seq and ChIP-Seq data showed that the transcription  
315 of several of the differentially expressed genes with roles in TM, IOP, and glaucoma, were

316 directly regulated by GLIS1 and included *MYOC*, *LTBP2*, *CHI3L1*, *HMGA1*, *CYP1B1*, and  
317 *LOXL1-4* (Supplementary Table 2). Genome browser tracks showing the location of  
318 GLIS1 peaks associated with several glaucoma-related genes, including *MYOC*,  
319 *CYP1B1*, and *ADAMTS10*, are shown in Figure 6. Interestingly, the GLIS1 binding peaks  
320 in the proximal promoter regions of *MYOC* and *CYP1B1* are located in a region near with  
321 a functional AP-1 responsive element (Figs. 5c and 6)<sup>52,53,54</sup>. In addition, the proximal  
322 promoter of *CYP1B1* contains a G/C-rich SP1 binding sequence, which because of its  
323 similarity to the consensus GLISBS might function as a GLIS1 binding site. This suggests  
324 that these promoter regions may function as a regulatory hub for several transcription  
325 factors. Moreover, this supports our hypothesis that the transcription of *MYOC*, *CYP1B1*,  
326 and other TM genes by GLIS1 is regulated in coordination with other transcription factors,  
327 including members of the AP-1 family.

328 KEGG pathways analysis of GLIS1 target genes down-regulated in HTM(shGLIS1),  
329 activated in HTM(pIND-GLIS1) or TM5(pIND-GLIS1) cells identified pathways associated  
330 with extracellular matrix (ECM), proteoglycans, and cellular adhesion among the top  
331 pathways in all three data sets (Supplementary Figure 13). This is consistent with recent  
332 bioinformatics analyses of TM gene expression data that identified cell matrix and cell-  
333 cell interaction related pathways among the top pathways involved in the pathogenesis  
334 of POAG<sup>55</sup>.

335

### 336 **Association of *GLIS1* rs941125 with glaucoma**

337 Our study of Glis1-KO mice identified a critical regulatory function for GLIS1 in the  
338 maintenance and function of the TM, a tissue that plays a major role in controlling AqH

339 outflow and the development of glaucoma<sup>1,15,56,57</sup>. These findings raised the question  
340 whether *GLIS1* might be involved in the pathogenesis of human glaucoma as well. To  
341 assess this, we examined the association of SNPs in the *GLIS1* region and the risk of  
342 glaucoma, combining information from the GERA and UKB cohorts<sup>9</sup>. rs941125, which  
343 localizes to intron 1 of *GLIS1*, was the most strongly associated SNP in the region,  
344 reaching a Bonferroni corrected level of significance (Odds Ratio = 0.94,  $P=4.73 \times 10^{-6}$ )  
345 (Figure 7 and Supplementary Table 3). The association of rs941125 with POAG has  
346 recently been confirmed and replicated in additional cohorts at a genome-wide level of  
347 significance ( $P=2.01 \times 10^{-11}$ , meta-analysis)<sup>58</sup>. Furthermore, rs941125 is significantly  
348 associated with variation in *GLIS1* gene expression in several tissues in GTEx  
349 (<https://gtexportal.org/home/snp/rs941125>). Together, these findings support a role for  
350 *GLIS1* in glaucoma pathogenesis in humans.

351

## 352 Discussion

353  
354  
355 In this study, we identify a critical role for the transcription factor GLIS1 in the maintenance  
356 of TM/ocular drainage tissue, AqH dynamics, and IOP. The TM is an essential component  
357 of the ocular drainage structure and TM abnormalities play a major role in the  
358 development of elevated IOP and glaucoma<sup>1,5,15,57,59,60</sup>. Utilizing *Glis1*-KO mice, we  
359 demonstrate that the loss of GLIS1 function causes a progressive degeneration of the TM  
360 leading to a disruption of ocular drainage structures. As a consequence of these changes,  
361 the AqH drainage is significantly compromised in *Glis1*-KO eyes causing elevated IOP.  
362 In addition, we identified several transcriptional targets of GLIS1 in TM cells that  
363 previously have been implicated in TM-related functions, IOP homeostasis, and ocular  
364 hypertension/glaucoma, including *MYOC*, *ADAMTS10*, *LTBP2*, *LOXL1*, *TGFBR3*,  
365 *CYP1B1*, and *EFEMP1*<sup>5,28,43,44</sup>. The reduced expression of a set of TM genes together is  
366 likely responsible for the TM dysfunction and elevated IOP in *Glis1*-KO mice. Importantly,  
367 we have detected significant associations between common genetic variants in the *GLIS1*  
368 region and POAG in humans, thereby supporting the role of *GLIS1* as a glaucoma risk  
369 gene. These variants may impact TM functions and compromise AqH drainage by altering  
370 GLIS1 expression and/or function and leading to elevated IOP and glaucoma.

371 The expression of *Glis1* in the TM and the degeneration of the TM in *Glis1*-KO mice  
372 suggested that GLIS1 plays a critical regulatory role in maintaining TM cell function and  
373 survival. It is possible that GLIS1 deficiency leads to the disruption of a cell-  
374 intrinsic biological process important in maintaining normal structure and TM function.  
375 Excessive loss of TM cells has been proposed to be a critical pathophysiological feature  
376 resulting in defective AqH drainage and high IOP<sup>14</sup>. Although pronounced loss of TM cells

377 in POAG patients was observed decades ago<sup>13,61</sup>, much remains yet to be understood  
378 with regards to cellular processes regulating the maintenance of the TM and survival of  
379 TM cells and its relevance to IOP and the different forms of glaucoma<sup>14,15,56</sup>. Various  
380 changes in the TM, including alterations in ECM and mitochondria, increased oxidative  
381 stress and apoptosis, have been implicated in outflow resistance, elevated IOP, and  
382 increased glaucoma risk<sup>15,41,42,55,62,63,64,65</sup>. Specifically, the ECM has been identified as a  
383 major player in maintaining the structural integrity and functionality of the TM<sup>55,59,61,64,65,66</sup>.  
384 Consistent with this, our gene profiling analyses identified ECM-related processes,  
385 cytoskeleton, and cellular adhesion as key pathways that are impacted as a consequence  
386 of *GLIS1* knockdown or ectopic expression of *GLIS1* (Figure 4e and f; Supplementary  
387 Figure 13). Moreover, several ECM-related genes, which levels changed in TM cells upon  
388 *GLIS1* knockdown or overexpression, have previously been implicated in elevated IOP  
389 and glaucoma, including members of the collagen I, IV, and VI families, *LTBP2*, a  
390 regulator of TGF $\beta$  signaling and ECM deposition<sup>28,67</sup>. Furthermore, the expression of a  
391 number of microfibril-associated genes are also impacted, including *FBN2*, encoding a  
392 microfibril-associated glycoprotein that contributes to elastin assembly in the ECM of the  
393 TM<sup>60,68</sup>. It further includes *LOXL1-4*, encoding lysyl oxidases that mediate the cross-  
394 linking of several extracellular matrix proteins, such as collagens and elastin<sup>21,69</sup>, and  
395 *ADAMTS10*, encoding a metalloproteinase involved in ECM assembly<sup>44,70</sup>. Alterations in  
396 the expression of these genes are likely to impact ECM assembly as well as its  
397 biomechanical properties, and physiological processes, such as differentiation, survival,  
398 and tissue organization that are regulated by the ECM-dependent signaling pathways<sup>71</sup>.  
399 Thus, altered cell-ECM interaction or abnormal ECM organization in *Glis1*-KO mice might

400 adversely affect the maintenance and biomechanical properties of the TM, thereby  
401 leading to progressive degeneration of the TM and disruption of the AqH drainage and  
402 subsequently to the development of elevated IOP and glaucoma<sup>14,42,62,63</sup>. Given a role for  
403 ECM-dependent pathways, it is possible that change in biomechanical properties of the  
404 TM (TM stiffness) may contribute to IOP changes, especially during an early time window  
405 prior to any obvious structural changes not captured by histological assessment.

406 In addition to these ECM and adhesion-related genes, transcriptome analysis showed  
407 that GLIS1 impacts the expression of several other TM-, IOP- and glaucoma-related  
408 genes, including *MYOC* and *CYP1B1* (Figure 4a, e, f; Supplementary Figure 12). It is  
409 interesting to note that the phenotypic changes in the TM observed in *Glis1*-KO mice  
410 exhibit some resemblance with those seen in *Cyp1b1*-deficient mice, including the  
411 collapse and degeneration of the TM<sup>37,61</sup>. Thus, the reduced *CYP1B1* expression might  
412 contribute to the structural changes in the TM and elevated IOP observed in *Glis1*-KO  
413 mice. In the case of *MYOC*, mutations in *MYOC* are thought to act by a gain of function  
414 mechanism resulting in the misfolding and accumulation of mutant *MYOC* leading to ER  
415 stress and apoptosis of TM cells<sup>72,73</sup>. Moreover, studies with *Myoc* knockout mice  
416 suggest that loss of *Myoc* function by itself does not cause ocular drainage tissue  
417 abnormalities or IOP elevation<sup>74</sup>. These studies indicate that reduced expression of *Myoc*  
418 observed in *Glis1*-KO mice is unlikely by itself inducing TM abnormalities and elevated  
419 IOP. We hypothesize that reduced expression of a set of genes rather than one particular  
420 single gene is causing the TM abnormalities and high IOP in GLIS1 deficiency, as we  
421 reported for the development of congenital hypothyroidism and neonatal diabetes in  
422 *Glis3*-KO mice<sup>32,47</sup>. Thus, the altered expression of a set of TM genes, including *CYP1B1*,

423 ADAMTS10, and LTBP2, may underlie TM dysfunction and elevated IOP. Therefore, the  
424 effect of *Glis1* deficiency on mouse TM is likely a cumulative effect of disruption of multiple  
425 pathways.

426 To establish which of the differentially expressed genes were directly regulated by  
427 GLIS1, we performed CHIP-Seq analysis. This analysis revealed that GLIS1 binding was  
428 associated with *MYOC*, *ADAMTS10*, *CYP1B1*, *MMP2*, and many other genes, suggesting  
429 that these genes are direct transcriptional targets of GLIS1 (Supplementary Table 2).  
430 Interestingly, many of the direct targets of GLIS1 have a role in the ECM or TM function  
431 and have been implicated in the pathogenesis of elevated IOP and glaucoma<sup>6,28,44,56</sup>.  
432 Homer motif analysis suggested co-localization of GLIS1 binding peaks with motifs of  
433 other transcription factors, including binding sites for members of the AP-1, TEAD, and  
434 forkhead box (FOX) families (Figure 5). Interestingly, the proximal promoters of *MYOC*  
435 and *CYP1B1* have been reported to contain functional binding sites for AP1-related  
436 transcription factors near the location of the GLIS1 binding peaks (Figure 6)<sup>52,53,54,75,76</sup>.  
437 The forkhead box member, FOXC1, has been implicated in the regulation of TM functions  
438 and glaucoma<sup>77,78</sup>, while the Hippo pathway through activation of TEAD transcription  
439 factors regulates ECM in TM cells and appears to have a role in glaucoma<sup>50,51,79</sup>.  
440 Together, these observations support a model in which a selective set of GLIS1 target  
441 genes are co-regulated with other transcription factors through their interaction within the  
442 same regulatory regions in TM-specific genes.

443 Our genetic studies provide further validation for a role of GLIS1 in glaucoma  
444 pathogenesis and extend our findings in mice to humans. The observed ocular drainage  
445 defects exhibited by *Glis1*-KO mice is more severe than those observed in POAG and

446 likely due to a complete deficiency of *GLIS1* and the suppression of many target genes,  
447 as compared to TM specific changes originating from potential gene dosage effects of  
448 POAG-associated variants. The lead SNP rs941125 is not only associated with glaucoma  
449 in multiple independent cohorts<sup>58</sup>, it is also detected as an eQTL associated with change  
450 in *GLIS1* expression (<https://gtexportal.org/home/snp/rs941125>). We note, however, that  
451 GTEx does not contain information on eye tissues and that the eQTL analysis for  
452 rs941125 is based on expression data from brain tissue. Future studies need to determine  
453 whether rs941125 or other SNPs in linkage disequilibrium with rs941125 are located  
454 within gene regulatory elements (such as enhancers) that affect *GLIS1* expression and  
455 how alteration of these regulatory elements predispose the eyes to TM dysfunction  
456 leading to IOP elevation. Since POAG is multifactorial, it is likely that variants in other  
457 genes together with *GLIS1* SNPs may cooperate to induce high IOP in patients. The  
458 absence of such other modifier alleles in *Glis1* heterozygous mice might explain why the  
459 presence of a single knockout allele of *Glis1* is not sufficient to induce ocular drainage  
460 defects leading to elevated IOP.

461 In this study, we identify a critical role for *GLIS1* in the maintenance and regulation of  
462 TM function, AqH dynamics, and IOP. *GLIS1* together with other transcription factors  
463 might be part of a regulatory network required for proper maintenance and functioning of  
464 ocular drainage tissue and IOP homeostasis<sup>45</sup>. Thus, *Glis1*-KO mice provide us with a  
465 valuable model to uncover cellular and molecular mechanisms that underlie the regulation  
466 of TM maintenance and ocular drainage tissue homeostasis and potentially lead to new  
467 insights into the pathogenesis of glaucoma. In addition, our data further suggest that  
468 altered expression of *GLIS1* in individuals carrying the risk allele may confer increased



469 susceptibility towards developing POAG possibly by impacting the TM and thereby  
470 contributing to elevated IOP. Finally, as has been shown for the hedgehog/GLI signaling  
471 pathway, regulation of GLIS proteins<sup>25</sup> by primary cilium-associated G protein-coupled  
472 receptors might be useful for the development of new therapeutic strategies in the  
473 management of various pathologies, including glaucoma.

474

475

## 476 **METHODS**

### 477 **Glis1-deficient mice**

478 Glis1-deficient mice (*Glis1*-KO) were described previously<sup>30</sup>. Mice were bred into the  
479 C57BL/6NCrl Charles River, Wilmington, MA) and 129S6/SvEvTac (Taconic, Rensselaer,  
480 NY) backgrounds for at least 7 generations. We ensured that mice maintained in  
481 C57BL/6NCrl neither carried homozygous RD8 mutation nor exhibited retinal  
482 degeneration (based on ocular histological assessment). *Glis1*-KO mice on both  
483 backgrounds developed enlarged eyes and appeared to exhibit a similar phenotype. Most  
484 experiments were carried out with *Glis1*-KO C57BL/6NCrl mice. Mice were supplied *ad*  
485 *libitum* with autoclaved NIH-31 rodent diet (Harlan Laboratories, Madison, WI) and  
486 provided with distilled drinking water and were group-housed in individually ventilated  
487 cages (Techniplast, Exton, PA). Experiments took place in an AAALAC accredited facility  
488 maintained at 70-73°F, relative humidity 40-60%, and 12h:12h light- dark cycle. All mice  
489 were negative for rodent murine pathogens. Littermate wild-type (WT) mice were used as  
490 controls. All animal protocols followed the guidelines outlined by the NIH Guide for the  
491 Care and Use of Laboratory Animals and were approved by the Institutional Animal Care  
492 and Use Committee at the NIEHS. Routine genotyping was carried out with the following  
493 primers: *Glis1*-F, 5'-AGCTAGTGGCTTTCGCCAACA; *Glis1*-R, 5'-  
494 GAACAAGATAGAATCATGG-TATATCC and Neo-pro, 5'-  
495 ACGCGTCACCTTAATATGCG.

496

### 497 **T3, T4, and thyroid stimulating hormone (TSH) assays**

498 Blood levels of T3 and T4 were measured by radioimmunoassay (MP Biomedicals,  
499 Orangeburg, NY) as described previously<sup>32</sup>. Serum TSH was analyzed with a mouse  
500 pituitary magnetic bead panel kit (EMD Millipore Corp., Billerica, MA.

501

### 502 **RNAscope *in situ* hybridization**

503 *In situ* hybridization was carried out on formalin-fixed paraffin embedded tissue sections  
504 using the RNAScope system (Advanced Cell Diagnostic, Hayward, CA) per  
505 manufacturer's instructions and as previously described<sup>80</sup>.

506

### 507 **Intraocular Pressure Measurement**

508 IOP of both eyes in age- and gender-matched WT and *Glis1*-KO littermates was  
509 measured using the Icare TonoLab rebound tonometer (Icare, Helsinki, Finland).  
510 Immediately prior to measurement animals were briefly sedated using isoflurane. IOP  
511 was measured at least 4 times/eye within a 30 min time frame with each individual IOP  
512 recorded representing the average of six measurements, giving a total of 24 rebounds  
513 from the same eye.

514

### 515 **Ocular angle assessment**

516 Hematoxylin and eosin-stained ocular sections cut from plastic embedded eyes were  
517 assessed to examine the morphology of the ocular angle structures. Briefly, mice were  
518 euthanized and eyes enucleated and immediately immersed in cold fixative (1% PFA, 2%  
519 glutaraldehyde, and 0.1 M cacodylate buffer) for at least 48 h, after which they were  
520 transferred to cold 0.1 M cacodylate buffer solution and stored at 4°C. We have found

521 that using this fixative, greatly improves capturing the SC in its intact/non-collapsed  
522 conformation. For example, at around 3 months of age 100% of WT eyes showed intact  
523 SC. Samples were embedded in glycol methacrylate, and serial sagittal sections (2  $\mu$ m)  
524 passing through the optic nerve were cut and stained with hematoxylin and eosin (H&E).  
525 Ten similarly spaced sections corresponding to the peripheral, mid- peripheral and central  
526 regions (passing through the optic nerve) of the eye were evaluated<sup>81</sup>. Both angles of a  
527 section were considered for evaluation. The prominent angle relevant structures,  
528 including TM, SC, Iris, ciliary processes were histologically examined. A representative  
529 image showing angle relevant tissues are indicated in Supplementary Figure 14. Eyes  
530 assessed for each of genotype included both sexes.

531 The sections corresponding to the central region of the eye were used for measuring  
532 the TM area, which in our experience provides the most reliable assessment. We imaged  
533 on average five consecutive serial sections per eye from both wild type and *Glis1*- KO  
534 mice. Cross-section images were taken using a 20X objective on the Zeiss Axiophot  
535 microscope with a 12 Mp Insight camera. TM images were captured by SPOT5.6 imaging  
536 software, assigned an accurate 20X calibration (to account for the magnification of the  
537 acquired image), and the TM area (marked in Supplementary Figs. 5, 6) was measured  
538 using the “region” tool under the EDIT menu. The mean TM area was calculated from a  
539 minimum of 5 central ocular sections/eye.

540

#### 541 **Assessment of the SC**

542 Briefly, the anterior segment is excised and the iris removed. The anterior segment cup  
543 is relaxed by making four centripetal cuts. These cuts generated four fan shaped

544 quadrants attached at the center. The SC runs along the rim (limbus) of each fan shaped  
545 quadrant. Whole mounts of the anterior segments from control and *Glis1*-KO mice were  
546 stained with an endomucin antibody<sup>82</sup>. Briefly, the anterior segment is excised and the iris  
547 removed. The anterior segment cup is relaxed by making four centripetal cuts. These cuts  
548 generated four fan shaped quadrants attached at the center. The Schlemm's canal runs  
549 along the rim (limbus) of each fan shaped quadrant. The anterior segment was stained  
550 with endomucin (5µg/ml; Thermo Fisher Scientific), whole mounted, and the entire limbus  
551 encompassing each of the four quadrants imaged using a Leica LSM SP8 confocal  
552 system and DM6000 vertical microscope. The limbal region was imaged with a 20x/0.75  
553 IMM CORR CS2–multi-immersion objective using glycerol immersion media. Overlapping  
554 regions (10%) were collected as Z-stacks at a resolution of 541x541x1 µm. The  
555 overlapping Z-stack of a quadrant was stitched using XuvStitch freeware<sup>83</sup>. The confocal  
556 Z-stack of the stitched quadrants of the limbus were rendered in three dimensions using  
557 the Surpass mode of Imaris 9.2 (Bitplane). Imaris Surface tool was used to render a  
558 surface on to the endomucin labeled Schlemm's canal. The volume was obtained from  
559 the “Statistic” tab under the surface algorithms in the software. The data was downloaded  
560 as a .csv file. The volumes of Schlemm's canal in quadrants were graphed using  
561 PlotsOfData-A web app for visualizing data together with their summaries<sup>84</sup>.

562

### 563 **AqH dynamics by Gadolinium magnetic resonance imaging (Gd MRI)**

564 AqH dynamics was analyzed by 3D Gd MRI as described<sup>34,35</sup>. The MR imaging data are  
565 accessible via the following url:  
566 <https://civmvoxport.vm.duke.edu/voxbase/studyhome.php?studyid=733>. All MRI

567 measurements were performed utilizing a 7.1-Tesla/22-cm horizontal bore Magnex  
568 magnet with an Agilent Direct Drive Console (Santa Clara, CA, USA), providing up to 770  
569 mT/m gradient strength, and a 35 mm transmit–receive birdcage coil. Mice (n=5) were  
570 anesthetized with isoflurane (2% for induction and 1.5% for maintenance) and kept warm  
571 with warm circulating air during the MRI experiment. Respiration rate was monitored using  
572 a small pneumatic pillow (SA Instruments, Inc., Stony Brook, NY, USA). Gadolinium-  
573 DTPA (Magnevist, Schering, Germany) was intraperitoneally (i.p.) injected at a dose of  
574 0.3 mmol/kg after one T1-weighted MR image was acquired at baseline. The MR contrast  
575 was thus administered at a dose calculated to normalize to the body mass for each  
576 animal.

577 Some mice were treated with the IOP lowering compound Ripasudil (0.4% normal  
578 isotonic saline; Sigma), which was administered in 5  $\mu$ l drops to the right eye, while normal  
579 isotonic saline was added to the left eye. T1-weighted MR images were acquired using  
580 a gradient echo sequence repeated over 2 h, sampling at 10 minutes intervals, for a total  
581 of 12 scans. The imaging parameters were repetition time/echo time = 200/1.92 ms, field  
582 of view =  $14.4 \times 14.4$  mm<sup>2</sup>, matrix 192x192, flip angle 20 degrees, BW 62.5 kHz, and  
583 the in-plane resolution was  $75 \times 75$   $\mu$ m<sup>2</sup>. 11 coronal slices, 0.38 mm thick were acquired.  
584 16 averages were used for each scan, resulting in total scan time for each temporal  
585 sampling interval of 10 min 12 seconds. An additional scan was acquired at the end of  
586 the dynamic contrast enhanced study, using identical parameters but increasing the  
587 number of averages to 64, to help delineate the anatomy. Select specimens were imaged  
588 *ex vivo* using a multi gradient echo sequence. Eye specimens were prepared after trans  
589 cardiac perfusion fixed with a mixture of saline and ProHance (10%), followed by a

590 mixture of formalin and ProHance (10%). The imaging parameters were repetition  
591 time/echo time = 50/3 ms, field of view =  $25.6 \times 12.8 \times 12.8$  mm<sup>2</sup>, matrix 512x256x256,  
592 flip angle 60 degrees, BW 62.5 kHz, and the 3D isotropic resolution was 50  $\mu$ m x 50  $\mu$ m  
593 x 50  $\mu$ m.

594 Regions of interest (ROIs) were manually drawn in the T1-weighted imaging slice  
595 bisecting the center of the globes, using ImageJ v1.47 (Wayne Rasband, National  
596 Institutes of Health, Bethesda, MD, USA). We measured the enhancement of the signal  
597 intensity (brightness of voxels) due to Gd accumulation in the anterior chamber, and our  
598 measurements were averaged over the entire ROIs. To compensate for inter animal  
599 variability and to reflect the relative enhancement in each animal, these measurements  
600 were normalized to the 10 min baseline. Several studies have demonstrated a linear  
601 relationship between the concentration of Gd and the spin lattice relaxation rate  
602 ( $R1=1/T1$ ) over limited ranges of concentration<sup>85,86,87</sup>. Mørkenborg et. al.<sup>88</sup> have  
603 performed experiments at 7T, the field used in these studies and demonstrated a linear  
604 correlation ( $r^2 > 0.92$ ) between signal intensity in a gradient echo for concentrations  
605 ranging between 0-3.0 mmol/lGd-DTPA. Thus, while concentration was not measured  
606 directly by measurement of  $R1$ , it can be inferred from the signal intensity. In addition, we  
607 have a curve normalization to the same time (10 min) acquired in each animal to adjust  
608 for different gains. The averaged time course from each ROI measurement before and  
609 after Gd injection was fitted into a sixth-degree polynomial using MatLab2016a (The  
610 MathWorks, Inc., Natick, MA, USA). The peak percentage (%) Gd signal enhancement,  
611 time to peak, initial rate of Gd signal increase within the first 10 minutes after Gd injection,  
612 and the area under the curve were extracted from the time courses and compared

613 between both eyes of the same groups using two-tailed paired *t*-tests, and across groups  
614 using one-way ANOVA and post hoc Tukey's tests. Data are presented as mean  $\pm$   
615 standard deviation unless otherwise specified. Results were considered significant  
616 when  $P < 0.05$ .

617

## 618 **Cell lines**

619 Human kidney HEK-293T cells were obtained from ATCC and grown in DMEM plus 10%  
620 FBS. Primary HTM cells were provided by Dr. T. Borrás. Cells were grown in Modified  
621 IMEM (Cat. No. A1048901) supplemented with 10% fetal bovine serum (FBS) (Gibco,  
622 Grand Island, NY) and 50  $\mu\text{g/ml}$  gentamycin (ThermoFisher) and used at  $<3$  passages.  
623 Immortalized HTM-like HTM5 cells (TM5)<sup>90</sup> were cultured in DMEM/F12 supplemented  
624 with 10% FBS, L-glutamine, penicillin (100 units/ml), streptomycin (0.1 mg/ml), and  
625 amphotericin B (4 mg/ml). Cells were tested negative for mycoplasma at NIEHS or UCSF.

626

## 627 **Reporter assay**

628 HEK-293T cells were transfected in Opti-MEM with pTAL-Luc-(GLISBS)<sub>6</sub> reporter, in  
629 which the luciferase reporter is under the control of six copies of GLISBS, pCMV- $\beta$ -Gal,  
630 and a pCMV10 expression plasmid containing wild type Flag-GLIS1 or a Flag-GLIS1  
631 mutant using Lipofectamine 2000. 24 hours later cells were harvested into 125  $\mu\text{l}$  reporter  
632 lysis buffer and luciferase activity and  $\beta$ -galactosidase levels measured using a luciferase  
633 assay kit (Promega, Madison, WI) and a luminometric  $\beta$ -galactosidase detection kit  
634 (Takara Bio, Palo Alto, CA) following the manufacturer's protocol. Experiments were  
635 carried out in independent triplicates<sup>89</sup>.



636

637 **GLIS1 shRNA knockdown**

638 GLIS1 knockdown in HTM cells was performed by infecting cells with GLIS1 shRNA  
639 lentivirus (Dharmacon; GLIS1#1-TRCN0000107705 and GLIS1#5-TRCN0000107709 or  
640 scrambled shRNA (control)(MOI 1:10). These cells are referred to as HTM(shGLIS1) and  
641 HTM(Scr). 48 h later cells were collected and RNA isolated with a Purelink RNA mini kit  
642 (ThermoFisher Sci., Rockford, IL) for RNA-Seq analysis as described<sup>32,46</sup>.

643

644 **Quantitative-PCR**

645 Kidney, ciliary body, TM, cornea, and retina were dissected from eyes of 3-month-old WT  
646 mice (n=3), RNA was isolated using a RNeasy mini kit (Qiagen) and reverse-transcribed  
647 using the High-Capacity cDNA Archive Kit (Applied Biosystems, Foster City, CA). Glis1  
648 expression was then measured by digital droplet PCR (ddPCR) using the QX200™  
649 Droplet Digital™ PCR System (BioRad) and normalized to Hsp90a01 expression. Primers  
650 for Glis1 (Mouse; PrimePCR ddPCR Expression Probe Assay (BioRad); FAM;  
651 dMmuCPE5121630) and Hsp90ab1 (Mouse; PrimePCR ddPCR Expression Probe Assay  
652 (BioRad); HEX; dMmuCPE5097465). Accepted ddPCR reads had a minimum of 12,000  
653 events and cDNA concentrations were adjusted to be within 10 to 10,000 positive events.  
654 To analyze gene expression from cultured cells, QPCR analysis was performed using  
655 SYBR Green I (Applied Biosystems, Foster City, CA). RNA from cultured HTM and TM5  
656 cells was isolated with a Purelink RNA mini Kit (ThermoFisher) and QPCR analysis  
657 performed as described previously<sup>32,46</sup>. RNAs from human tissues were from a Clontech

658 Human Total RNA Master Panel II (#636643). Primer sequences are listed in  
659 Supplementary Table 1.

660

### 661 **ChIP-Seq analysis with Flag-GLIS1-HA HTM and TM5 cells**

662 Since no suitable GLIS1 antibody is available for ChIP-Seq analysis, we used primary  
663 HTM cells transiently expressing doxycycline (Dox)-inducible Flag-GLIS1-HA and a TM-  
664 like cell line, TM5, that stably expressed Dox-inducible Flag-GLIS1-HA. First, a  
665 pIND20(Flag-GLIS1-HA) plasmid was generated by inserting Flag-GLIS1-HA into the  
666 (Dox)-inducible lentiviral expression vector pIND20<sup>91</sup> and are referred to as HTM(pIND-  
667 GLIS1) and TM5(pIND-GLIS1), respectively. Lentivirus was generated by transient  
668 transfection of pIND20(Flag-GLIS3-HA) in HEK293T cells together with psPAX2 and  
669 pMD2.G plasmids. TM5 cells were infected with the pIND20(Flag-GLIS1-HA) lentivirus  
670 for 48 h and then selected in medium supplemented with 750 µg/ml G418 (Invitrogen,  
671 Carlsbad, CA). Flag-GLIS1-HA expression was induced by the addition of 300 µg/ml Dox  
672 (Sigma–Aldrich, St. Louis, MO). The expression of Flag-GLIS1-HA protein was examined  
673 by immunofluorescence. The relative fluorescent signal in nuclei was determined using  
674 ImageJ software (Fuji) as described<sup>92</sup>. To identify genes directly regulated by GLIS1,  
675 ChIP-Seq analysis was performed using TM5 cells stably expressing doxycycline (Dox)-  
676 inducible GLIS1-HA. ChIP analysis was performed as described previously<sup>32,46</sup>. Cells  
677 were treated with and without Dox for 18 h and crosslinked with 1% formaldehyde in PBS  
678 for 10 min at RT and then quenched by glycine (final 125 mM) for 10 min at RT. Cells  
679 were washed two times with PBS and then sonicated for 40 min (S220 focused-  
680 ultrasonicator, Covaris, Woburn, MA). After removal of cell debris, chromatin was

681 incubated overnight with HA antibody (Cell Signaling, #3724) and subsequently,  
682 incubated with Dynabeads Protein G (ThermoFisher Scientific, 10004D) for 3 h at 4°C to  
683 pulldown GLIS1-HA-chromatin complexes. The chromatin-bound beads were then  
684 washed and reverse crosslinked. Libraries were made with the ChIPed-DNA using  
685 Nextflex ChIP-Seq Library Prep kit (PerkinElmer). Sequencing reading was performed  
686 with a NovaSeq 6000 system (Illumina). TM5(-Dox) cells served as negative control to  
687 determine specificity<sup>93</sup>. UCSC Genome Browser Human Feb. 2009 (GRCh37/hg19)  
688 Assembly was used to generate the genome browser tracks.

689

### 690 **ChIP-seq analysis**

691 ChIP-seq data was generated as single-end reads with a NovaSeq 6000 (Illumina). Raw  
692 sequence reads were filtered to remove any entries with a mean base quality score < 20.  
693 Adapters were removed via Cutadapt v1.12 with parameters “-a AGATCGGAAGAG -O 5  
694 -q 0”, then reads were filtered to exclude those with length <30bp after trimming. Filtered  
695 and trimmed reads were mapped against the hg19 reference assembly (excluding  
696 haplotype chromosomes) via Bowtie v1.2, with only uniquely-mapped hits accepted.  
697 Duplicate mapped reads were removed by Picard tools MarkDuplicates.jar (v1.110). Initial  
698 peak calls were made with HOMER (v4.10.3) with parameters “-style factor -fdr 0.00001”,  
699 comparing each ChIP sample (Dox+ or Dox-) against its associated input sample. The  
700 Dox+ peak set was then filtered to exclude any peak that (a) overlapped a Dox- peak, (b)  
701 has fold change over input <8x (as reported by HOMER), or (c) has fold change over local  
702 signal <8x (as reported by HOMER). The Dox+ peaks were re-sized to 200bp centered  
703 on the called peak midpoints prior to downstream analysis. Enriched motifs were

704 identified by HOMER 'findMotifsGenome' at "-size given" and all other parameters default.  
705 Coverage tracks for genome browser views were generated by extending each uniquely  
706 mapped non-duplicate read to the estimated average fragment size of 150bp, depth  
707 normalizing to 25M reads, then converting to bedGraph format with BEDtools v2.24.0  
708 genomeCoverageBed and subsequently to bigwig format with UCSC utility  
709 bedGraphToBigWig v4.

710

### 711 **RNA-seq analysis**

712 RNA-seq data was generated as paired-end reads with a NextSeq 5000 (Illumina). Raw  
713 sequence reads were filtered to remove any entries with a mean base quality score < 20  
714 for either end in the pair. Filtered reads were then mapped to the hg19 reference  
715 assembly (excluding haplotype chromosomes) via STAR v2.5 with parameters "--  
716 outSAMattrIHstart 0 --outFilterType BySJout --alignSJoverhangMin 8 --limitBAMsortRAM  
717 55000000000 --outSAMstrandField intronMotif --outFilterIntronMotifs  
718 RemoveNoncanonical". Counts per gene were determined via featureCounts (Subread  
719 v1.5.0-p1) with parameters "-s0 -Sfr" for Gencode V28 gene models. Differential analysis  
720 was performed with DESeq2 v1.14.1.

721

### 722 **Pathway analysis**

723 Pathway analysis was performed via DAVID tools (v6.8) for KEGG pathway analysis<sup>94,95</sup>.

724

### 725 **Immunostaining**

726 Expression of GLIS1- $\beta$ GAL fusion protein was examined by staining tissue sections with  
727 chicken anti- $\beta$ GAL (1:500, ab9361, Abcam) and Alexa Fluor@ 488 donkey anti-chicken  
728 IgG (1:2000, A11039, Invitrogen) as described previously<sup>96</sup>. Expression of Anti-HA fusion  
729 protein was examined by staining cells with rabbit Anti-HA (1:250; #3724, Cell Signaling  
730 Technology) and Alexa Fluor@ 488 donkey anti-rabbit IgG (1:2000, A21208, Invitrogen).  
731 Fluorescence observed in a Zeiss LSM 710 confocal microscope.

732

### 733 **Genetic association analyses**

734 To determine the association of genetic variants in the *GLIS1* region with glaucoma, we  
735 utilized the Genetic Epidemiology Research in Adult Health and Aging (GERA) cohort  
736 comprising of 4,986 POAG cases and 58,426 controls and a multiethnic UK Biobank  
737 (UKB; <https://www.ukbiobank.ac.uk/>) cohort consisting of 7,329 glaucoma (subtype  
738 unspecified) cases and 169,561 controls from five ethnic groups (European, East Asian,  
739 South Asian, African British, and mixed ancestries. The GERA cohort consists of 110,266  
740 adult men and women, 18 years and older, who are of non-Hispanic white,  
741 Hispanic/Latino, Asian or African American ethnicity. Participants from the GERA cohort  
742 are members of the Kaiser Permanente Northern California (KPNC) integrated health  
743 care delivery system and provided self-reported information via the Research Program  
744 on Genes, Environment, and Health (RPGEH) survey. The UKB is a large prospective  
745 study following the health of approximately 500,000 participants from 5 ethnic groups  
746 (European, East Asian, South Asian, African British, and mixed ancestries) in the UK  
747 aged between the ages of 40 and 69. For UKB participants, demographic information and  
748 medical history were ascertained through touch-screen questionnaires. UKB participants

749 also underwent a wide range of physical and cognitive assessments, including blood  
750 sampling. GERA individuals' DNA samples were extracted using Oragene kits (DNA  
751 Genotek Inc., Ottawa, ON, Canada) at KPNC and genotyped at the Genomics Core  
752 Facility of UCSF. DNA samples were genotyped at over 665,000 genetic markers on four  
753 race/ethnicity specific Affymetrix Axiom arrays (Affymetrix, Santa Clara, CA, USA)  
754 optimized for European, Latino, East Asian, and African-American individuals. We  
755 performed genotype quality control (QC) procedures for the GERA samples on an array-  
756 wise basis. Briefly, we included genetic markers with initial genotyping call rate  $\geq 97\%$ ,  
757 genotype concordance rate  $> 0.75$  across duplicate samples, and allele frequency  
758 difference  $\leq 0.15$  between females and males for autosomal markers. Approximately 94%  
759 of samples and over 98% of genetic markers assayed reached QC procedures. Moreover,  
760 genetic markers with genotype call rates  $< 90\%$  were excluded, as well as genetic  
761 markers with a MAF  $< 1\%$ . We also performed imputation on an array-wise basis.  
762 Following the prephasing of genotypes with Shape-IT v2.r7271959, we imputed genetic  
763 markers from the cosmopolitan 1000 Genomes Project reference panel (phase I  
764 integrated release; <http://1000genomes.org>) using IMPUTE2 v2.3.060. We used the  
765 information  $r^2$  from IMPUTE2 as a QC parameter, which is an estimate of the correlation  
766 of the imputed genotype to the true genotype<sup>9,22,97</sup>. *GLIS1* gene locus was defined as  
767  $\pm 500$  kb upstream and downstream of the sequence using UCSC Genome Browser  
768 Assembly February 2009 (GRCh37/hg19). PLINK v1.9 was used to perform a logistic  
769 regression of the outcome and each SNP. Other statistical analyses and data  
770 management were performed in the language-and-environment R, version 3.6.0, using  
771 functions from the default libraries. All study procedures were approved by the KPNC

772 Institutional Review Board and the protocols followed are compliant with specific Ethical  
773 Regulations. Written informed consent was obtained from all participants. The GLIS1  
774 variant-level associations with glaucoma are fully disclosed in the manuscript  
775 (Supplementary Table 3 “Association of GLIS1 SNPs with POAG in the multiethnic meta-  
776 analysis (GERA+UKB)”). The meta-analysis GWAS summary statistics of glaucoma are  
777 available from the NHGRI-EBI GWAS Catalog study  
778 <https://www.ebi.ac.uk/gwas/search?query=GCST006065>.

779

### 780 **Statistical analysis**

781 Data are presented as mean  $\pm$  standard deviation (SD) and were analyzed using 2-tailed  
782 Student’s *t*-test using using Microsoft Excel and/or Prism 8.4 (GraphPad). To identify  
783 genetic variants in *GLIS1* associated with glaucoma, we performed logistic regression  
784 analysis adjusted for age, sex, and ancestry principal components.

785

### 786 **Data availability**

787 The CHIP-seq and RNA-seq data described in this manuscript have been deposited in the NCBI  
788 Gene Expression Omnibus (GEO) with accession [GSE156846](https://www.ncbi.nlm.nih.gov/geo/query/acc.cgi?acc=GSE156846).

789 The meta-analysis GWAS summary statistics of glaucoma are available from the NHGRI-EBI  
790 GWAS Catalog (<https://www.ebi.ac.uk/gwas/downloads/summary-statistics>), study accession  
791 number GCST006065 (<https://www.ebi.ac.uk/gwas/search?query=GCST006065>).

792 The MR imaging data will be accessible after registration at the following url (a password will be  
793 issued the following day that will provide access):

794 <https://civmvoxport.vm.duke.edu/voxbase/studyhome.php?studyid=733>.

795

796

### 797 **REFERENCES**

- 798 1. Weinreb, R. N., Aung, T., Medeiros, F. A. The pathophysiology and treatment of  
799 glaucoma: a review. *Jama* **311**, 1901-1911 (2014).
- 800 2. Quigley, H. A., Broman, A. T. The number of people with glaucoma worldwide in  
801 2010 and 2020. *Br. J. Ophthalmol.* **90**, 262-267 (2006).
- 802 3. Weinreb, R. N., et al. Primary open-angle glaucoma. *Nat. Rev. Dis. Primers* doi:  
803 10.1038/nrdp.2016.67 (2016).
- 804 4. Wiggs, J. L., Pasquale, L. R. Genetics of glaucoma. *Hum. Mol. Genet.* **26**, R21-R27  
805 (2017).
- 806 5. Choquet, H., Wiggs, J. L., Khawaja, A. P. Clinical implications of recent advances in  
807 primary open-angle glaucoma genetics. *Eye (Lond)* **34**, 29-39 (2020).
- 808 6. Lewis, C. J., Hedberg-Buenz, A., DeLuca, A. P., Stone, E. M., Alward, W. L. M.,  
809 Fingert, J. H. Primary congenital and developmental glaucomas. *Hum. Mol. Genet.*  
810 **26**, R28-R36 (2017).
- 811 7. Libby, R. T., Gould, D. B., Anderson, M. G., John, S. W. Complex genetics of  
812 glaucoma susceptibility. *Annu. Rev. Genomics Hum. Genet.* **6**, 15-44 (2005).
- 813 8. Bailey, J. N., et al. Genome-wide association analysis identifies TXNRD2, ATXN2  
814 and FOXC1 as susceptibility loci for primary open-angle glaucoma. *Nat. Genet.* **48**,  
815 189-194 (2016).
- 816 9. Choquet, H., et al. A multiethnic genome-wide association study of primary open-  
817 angle glaucoma identifies novel risk loci. *Nat. Commun.* doi: 10.1038/s41467-018-  
818 04555-4 (2018).
- 819 10. Costagliola, C., et al. How many aqueous humor outflow pathways are there? *Surv.*  
820 *Ophthalmol.* **65**, 144-170 (2020).
- 821 11. Abu-Hassan, D. W., Acott, T. S., Kelley, M. J. The Trabecular Meshwork: A Basic  
822 Review of Form and Function. *J. Ocul. Biol.* **2**, doi: 10.13188/2334-2838.1000017  
823 (2014).
- 824 12. Sacca, S. C., Pulliero, A., Izzotti, A. The dysfunction of the trabecular meshwork  
825 during glaucoma course. *J. Cell. Physiol.* **230**, 510-525 (2015).
- 826 13. Alvarado, J., Murphy, C., Juster, R. Trabecular meshwork cellularity in primary  
827 open-angle glaucoma and nonglaucomatous normals. *Ophthalmology* **91**, 564-579  
828 (1984).



- 829 14. Grierson, I., Hogg, P. The proliferative and migratory activities of trabecular  
830 meshwork cells. *Progr. Retin. Eye Res.* **15**, 33-67 (1995).
- 831 15. Stamer, W. D., Clark, A. F. The many faces of the trabecular meshwork cell. *Exp.*  
832 *Eye Res.* **158**, 112-123 (2017).
- 833 16. Youngblood, H., Hauser, M. A., Liu, Y. Update on the genetics of primary open-  
834 angle glaucoma. *Exp. Eye Res.* **188**, 107795 (2019).
- 835 17. Bonnemaier, P. W. M., et al. Genome-wide association study of primary open-  
836 angle glaucoma in continental and admixed African populations. *Hum. Genet.* **137**,  
837 847-862 (2018).
- 838 18. Khawaja, A. P., et al. Genome-wide analyses identify 68 new loci associated with  
839 intraocular pressure and improve risk prediction for primary open-angle glaucoma.  
840 *Nat. Genet.* **50**, 778-782 (2018).
- 841 19. Khor, C. C., et al. Genome-wide association study identifies five new susceptibility  
842 loci for primary angle closure glaucoma. *Nat. Genet.* **48**, 556-562 (2016).
- 843 20. Nongpiur, M. E., et al. Evaluation of Primary Angle-Closure Glaucoma Susceptibility  
844 Loci in Patients with Early Stages of Angle-Closure Disease. *Ophthalmology*, **125**,  
845 664-670 (2018).
- 846 21. Shiga, Y., et al. Genome-wide association study identifies seven novel susceptibility  
847 loci for primary open-angle glaucoma. *Hum. Mol. Genet.* **27**, 1486-1496 (2018).
- 848 22. Choquet, H., et al. A large multi-ethnic genome-wide association study identifies  
849 novel genetic loci for intraocular pressure. *Nat. Commun.* doi: 10.1038/s41467-017-  
850 01913-6 (2017).
- 851 23. Huang, L., et al. Genome-wide analysis identified 17 new loci influencing intraocular  
852 pressure in Chinese population. *Sci. China Life Sci.* **62**, 153-164 (2019).
- 853 24. Zhuang, W., et al. Genotype-ocular biometry correlation analysis of eight primary  
854 angle closure glaucoma susceptibility loci in a cohort from Northern China. *PLoS*  
855 *One* **13**, e0206935 (2018).
- 856 25. Jetten, A. M. GLIS1-3 transcription factors: critical roles in the regulation of multiple  
857 physiological processes and diseases. *Cell Mol. Life Sci.* **75**, 3473-3494 (2018).

- 858 26. Scoville, D. W., Kang, H. S., Jetten, A. M. Transcription factor GLIS3: Critical roles in  
859 thyroid hormone biosynthesis, hypothyroidism, pancreatic beta cells and diabetes.  
860 *Pharmacol. Ther.* doi: 10.1016/j.pharmthera.2020.107632 (2020).
- 861 27. Dimitri, P. The role of GLIS3 in thyroid disease as part of a multisystem disorder.  
862 *Best Pract. Res. Clin. Endocrinol. Metab.* **31**, 175-182 (2017).
- 863 28. Lim, S. H., et al. CYP1B1, MYOC, and LTBP2 mutations in primary congenital  
864 glaucoma patients in the United States. *Am. J. Ophthalmol.* **155**, 508-517.e505  
865 (2013).
- 866 29. Kim, Y. S., Lewandoski, M., Perantoni, A. O., Kurebayashi, S., Nakanishi, G.,  
867 Jetten, A. M. Identification of Glis1, a novel Gli-related, Kruppel-like zinc finger  
868 protein containing transactivation and repressor functions. *J. Biol. Chem.* **277**,  
869 30901-30913 (2002).
- 870 30. Nakashima, M., et al. A novel gene, GliH1, with homology to the Gli zinc finger  
871 domain not required for mouse development. *Mech. Dev.* **119**, 21-34 (2002).
- 872 31. Dong, Y. H., Fu, D. G. Autoimmune thyroid disease: mechanism, genetics and  
873 current knowledge. *Eur. Rev. Med. Pharmacol. Sci.* **18**, 3611-3618 (2014).
- 874 32. Kang, H. S., et al. GLIS3 is indispensable for TSH/TSHR-dependent thyroid  
875 hormone biosynthesis and follicular cell proliferation. *J. Clin. Invest.* **127**, 4326-4337  
876 (2017).
- 877 33. Nikiforova, M. N., et al. GLIS Rearrangement is a Genomic Hallmark of Hyalinizing  
878 Trabecular Tumor of the Thyroid Gland. *Thyroid* **29**, 161-173 (2019).
- 879 34. Ho, L. C., et al. In vivo assessment of aqueous humor dynamics upon chronic  
880 ocular hypertension and hypotensive drug treatment using gadolinium-enhanced  
881 MRI. *Invest. Ophthalmol. Vis. Sci.* **55**, 3747-3757 (2014).
- 882 35. Crosbie, D. E., Keaney, J., Tam, L. C. S., Daniel Stamer, W., Campbell, M.,  
883 Humphries, P. Age-related changes in eye morphology and aqueous humor  
884 dynamics in DBA/2J mice using contrast-enhanced ocular MRI. *Magn. Reson.*  
885 *Imaging* **59**, 10-16 (2019).
- 886 36. Kaneko, Y., et al. Effects of K-115 (Ripasudil), a novel ROCK inhibitor, on  
887 trabecular meshwork and Schlemm's canal endothelial cells. *Sci. Rep.* doi:  
888 10.1038/srep19640 (2016).

- 889 37. Libby, R. T., et al. Modification of ocular defects in mouse developmental glaucoma  
890 models by tyrosinase. *Science* **299**, 1578-1581 (2003).
- 891 38. Smith, R. S., et al. Haploinsufficiency of the transcription factors FOXC1 and  
892 FOXC2 results in aberrant ocular development. *Hum. Mol. Genet.* **9**, 1021-1032  
893 (2000).
- 894 39. Sethi, A., Mao, W., Wordinger, R. J., Clark, A. F. Transforming growth factor-beta  
895 induces extracellular matrix protein cross-linking lysyl oxidase (LOX) genes in  
896 human trabecular meshwork cells. *Invest. Ophthalmol. Vis. Sci.* **52**, 5240-5250  
897 (2011).
- 898 40. Carnes, M. U., Allingham, R. R., Ashley-Koch, A., Hauser, M. A. Transcriptome  
899 analysis of adult and fetal trabecular meshwork, cornea, and ciliary body tissues by  
900 RNA sequencing. *Exp. Eye Res.* **167**, 91-99 (2018).
- 901 41. Borrás, T. Mechanosensitive Genes in the Trabecular Meshwork at Homeostasis.  
902 In: *Ophthalmology Research: Mechanisms of the Glaucomas* (eds Tombran-Tink J.,  
903 Barnstable C. J., Shields M. B.). Humana Press (2008).
- 904 42. Filla, M. S., Dimeo, K. D., Tong, T., Peters, D. M. Disruption of fibronectin matrix  
905 affects type IV collagen, fibrillin and laminin deposition into extracellular matrix of  
906 human trabecular meshwork (HTM) cells. *Exp. Eye Res.* **165**, 7-19 (2017).
- 907 43. Mackay, D. S., Bennett, T. M., Shiels, A. Exome Sequencing Identifies a Missense  
908 Variant in EFEMP1 Co-Segregating in a Family with Autosomal Dominant Primary  
909 Open-Angle Glaucoma. *PLoS One* doi: 10.1371/journal.pone.0132529 (2015).
- 910 44. Kuchtey, J., et al. Mapping of the disease locus and identification of ADAMTS10 as  
911 a candidate gene in a canine model of primary open angle glaucoma. *PLoS Genet.*  
912 doi: 10.1371/journal.pgen.1001306 (2011).
- 913 45. Moazzeni, H., Mirrahimi, M., Moghadam, A., Banaei-Esfahani, A., Yazdani, S., Elahi,  
914 E. Identification of genes involved in glaucoma pathogenesis using combined  
915 network analysis and empirical studies. *Hum. Mol. Genet.* **28**, 3637-3663 (2019).
- 916 46. Jeon, K., Kumar, D., Conway, A. E., Park, K., Jothi, R., Jetten, A. M. GLIS3  
917 Transcriptionally Activates WNT Genes to Promote Differentiation of Human  
918 Embryonic Stem Cells into Posterior Neural Progenitors. *Stem Cells* **37**, 202-215  
919 (2019).

- 920 47. Scoville, D., Lichti-Kaiser, K., Grimm, S., Jetten, A. GLIS3 binds pancreatic beta cell  
921 regulatory regions alongside other islet transcription factors. *J. Endocrinol.* **243**, 1-  
922 14 (2019).
- 923 48. Jin, Y., Liang, Z., Lou, H. The Emerging Roles of Fox Family Transcription Factors  
924 in Chromosome Replication, Organization, and Genome Stability. *Cells* doi:  
925 10.3390/cells9010258 (2020).
- 926 49. Lin, K. C., Park, H. W., Guan, K. L. Regulation of the Hippo Pathway Transcription  
927 Factor TEAD. *Trends Biochem. Sci.* **42**, 862-872 (2017).
- 928 50. Peng, J., Wang, H., Wang, X., Sun, M., Deng, S., Wang, Y. YAP and TAZ mediate  
929 steroid-induced alterations in the trabecular meshwork cytoskeleton in human  
930 trabecular meshwork cells. *Int. J. Mol. Med.* **41**, 164-172 (2018).
- 931 51. Wang, X., et al. Mutual regulation of the Hippo/Wnt/LPA/TGFbeta signaling  
932 pathways and their roles in glaucoma (Review). *Int. J. Mol. Med.* **41**, 1201-1212  
933 (2018).
- 934 52. Kirstein, L., Cvekl, A., Chauhan, B. K., Tamm, E. R. Regulation of human  
935 myocilin/TIGR gene transcription in trabecular meshwork cells and astrocytes: role  
936 of upstream stimulatory factor. *Genes Cells* **5**, 661-676 (2000).
- 937 53. Hwang, Y. P., et al. WY-14643 Regulates CYP1B1 Expression through Peroxisome  
938 Proliferator-Activated Receptor alpha-Mediated Signaling in Human Breast Cancer  
939 Cells. *Int. J. Mol. Sci.* doi: 10.3390/ijms20235928 (2019).
- 940 54. Zheng, W., Jefcoate, C. R. Steroidogenic factor-1 interacts with cAMP response  
941 element-binding protein to mediate cAMP stimulation of CYP1B1 via a far upstream  
942 enhancer. *Mol. Pharmacol.* **67**, 499-512 (2005).
- 943 55. Liesenborghs, I., et al. Comprehensive bioinformatics analysis of trabecular  
944 meshwork gene expression data to unravel the molecular pathogenesis of primary  
945 open-angle glaucoma. *Acta Ophthalmol.* **98**, 48-57 (2020).
- 946 56. Borrás, T. Gene expression in the trabecular meshwork and the influence of  
947 intraocular pressure. *Prog. Retin. Eye Res.* **22**, 435-463 (2003).
- 948 57. Liu, Y., Allingham, R. R. Major review: Molecular genetics of primary open-angle  
949 glaucoma. *Exp. Eye Res.* **160**, 62-84 (2017).

- 950 58. Gharahkhani, P., et al. Genome-wide meta-analysis identifies 127 open-angle  
951 glaucoma loci with consistent effect across ancestries. *Nat. Commun.* **12**, doi:  
952 10.1038/s41467-020-20851-4 (2021).
- 953 59. Chatterjee, A., Villarreal, G., Jr., Rhee, D. J. Matricellular proteins in the trabecular  
954 meshwork: review and update. *J. Ocul. Pharmacol. Ther.* **30**, 447-463 (2014).
- 955 60. Comes, N., Borrás, T. Individual molecular response to elevated intraocular  
956 pressure in perfused postmortem human eyes. *Physiol. Genomics* **38**, 205-225  
957 (2009).
- 958 61. Teixeira, L. B., Zhao, Y., Dubielzig, R. R., Sorenson, C. M., Sheibani, N.  
959 Ultrastructural abnormalities of the trabecular meshwork extracellular matrix in  
960 Cyp1b1-deficient mice. *Vet. Pathol.* **52**, 397-403 (2015).
- 961 62. Filla, M. S., Faralli, J. A., Peotter, J. L., Peters, D. M. The role of integrins in  
962 glaucoma. *Exp. Eye Res.* **158**, 124-136 (2017).
- 963 63. WuDunn, D. Mechanobiology of trabecular meshwork cells. *Exp. Eye Res.* **88**, 718-  
964 723 (2009).
- 965 64. Vranka, J. A., Kelley, M. J., Acott, T. S., Keller, K. E. Extracellular matrix in the  
966 trabecular meshwork: intraocular pressure regulation and dysregulation in  
967 glaucoma. *Exp. Eye Res.* **133**, 112-125 (2015).
- 968 65. Acott, T. S., Kelley, M. J. Extracellular matrix in the trabecular meshwork. *Exp. Eye*  
969 *Res.* **86**, 543-561 (2008).
- 970 66. O'Callaghan, J., Cassidy, P. S., Humphries, P. Open-angle glaucoma:  
971 therapeutically targeting the extracellular matrix of the conventional outflow  
972 pathway. *Expert Opin. Ther. Targets* **21**, 1037-1050 (2017).
- 973 67. Saeedi, O., Yousaf, S., Tsai, J., Palmer, K., Riazuddin, S., Ahmed, Z. M.  
974 Delineation of Novel Compound Heterozygous Variants in LTBP2 Associated with  
975 Juvenile Open Angle Glaucoma. *Genes (Basel)* doi: 10.3390/genes9110527  
976 (2018).
- 977 68. Thomson, J., Singh, M., Eckersley, A., Cain, S. A., Sherratt, M. J., Baldock, C.  
978 Fibrillin microfibrils and elastic fibre proteins: Functional interactions and  
979 extracellular regulation of growth factors. *Semin. Cell Dev. Biol.* **89**, 109-117 (2019).

- 980 69. Wordinger, R. J., Clark, A. F. Lysyl oxidases in the trabecular meshwork. *J*  
981 *Glaucoma* **23**, S55-58 (2014).
- 982 70. Kuchtey, J., Kuchtey, R. W. The microfibril hypothesis of glaucoma: implications for  
983 treatment of elevated intraocular pressure. *J. Ocul. Pharmacol. Ther.* **30**, 170-180  
984 (2014).
- 985 71. Dzamba, B. J., DeSimone, D. W. Extracellular Matrix (ECM) and the Sculpting of  
986 Embryonic Tissues. *Curr. Top. Dev. Biol.* **130**, 245-274 (2018).
- 987 72. Zode, G. S., et al. Reduction of ER stress via a chemical chaperone prevents  
988 disease phenotypes in a mouse model of primary open angle glaucoma. *J. Clin.*  
989 *Invest.* **121**, 3542-3553 (2011).
- 990 73. Wang, H., Li, M., Zhang, Z., Xue, H., Chen, X., Ji, Y. Physiological function of  
991 myocilin and its role in the pathogenesis of glaucoma in the trabecular meshwork  
992 (Review). *Int. J. Mol. Med.* **43**, 671-681 (2019).
- 993 74. Kim, B. S., et al. Targeted disruption of the myocilin gene (Myoc) suggests that  
994 human glaucoma-causing mutations are gain of function. *Mol. Cell. Biol.* **21**, 7707-  
995 7713 (2001).
- 996 75. Polansky, J. R. Current perspectives on the TIGR/MYOC gene (Myocilin) and  
997 glaucoma. *Ophthalmol. Clin. North Am.* **16**, 515-527, v-vi (2003).
- 998 76. Saura, M., Cabana, M., Ayuso, C., Valverde, D. Mutations including the promoter  
999 region of myocilin/TIGR gene. *Eur. J. Hum. Genet.* **13**, 384-387 (2005).
- 1000 77. Paylakhi, S. H., et al. FOXC1 in human trabecular meshwork cells is involved in  
1001 regulatory pathway that includes miR-204, MEIS2, and ITGbeta1. *Exp. Eye Res.*  
1002 **111**, 112-121 (2013).
- 1003 78. Souzeau, E., et al. Glaucoma spectrum and age-related prevalence of individuals  
1004 with FOXC1 and PITX2 variants. *Eur. J. Hum. Genet.* **25**, 839-847 (2017).
- 1005 79. Ho, L. T. Y., Skiba, N., Ullmer, C., Rao, P. V. Lysophosphatidic Acid Induces ECM  
1006 Production via Activation of the Mechanosensitive YAP/TAZ Transcriptional  
1007 Pathway in Trabecular Meshwork Cells. *Invest. Ophthalmol. Vis. Sci.* **59**, 1969-1984  
1008 (2018).
- 1009 80. Wang, F., et al. RNAscope: a novel in situ RNA analysis platform for formalin-fixed,  
1010 paraffin-embedded tissues. *J. Mol. Diagn.* **14**, 22-29 (2012).



- 1011 81. Labelle-Dumais, C., et al. Loss of PRSS56 function leads to ocular angle defects  
1012 and increased susceptibility to high intraocular pressure. *Dis. Model Mech.* doi:  
1013 10.1242/dmm.042853 (2020).
- 1014 82. Kizhatil, K., Ryan, M., Marchant, J. K., Henrich, S., John, S. W. Schlemm's canal is  
1015 a unique vessel with a combination of blood vascular and lymphatic phenotypes  
1016 that forms by a novel developmental process. *PLoS Biol.* doi:  
1017 10.1371/journal.pbio.1001912 (2014).
- 1018 83. Emmenlauer, M., et al. XuvTools: free, fast and reliable stitching of large 3D  
1019 datasets. *J. Microsc.* **233**, 42-60 (2009).
- 1020 84. Postma, M., Goedhart, J. PlotsOfData-A web app for visualizing data together with  
1021 their summaries. *PLoS Biol.* doi: 10.1371/journal.pbio.3000202 (2019).
- 1022 85. Tweedle, M. F., et al. Dependence of MR signal intensity on Gd tissue  
1023 concentration over a broad dose range. *Magn. Reson. Med.* **22**, 191-194 (1991).
- 1024 86. Takeda, M., et al. Concentration of gadolinium-diethylene triamine pentaacetic acid  
1025 in human kidney--study on proper time for dynamic magnetic resonance imaging of  
1026 the human kidney on low and high magnetic fields. *Tohoku J. Exp. Med.* **171**, 119-  
1027 128 (1993).
- 1028 87. Verma, S., et al. Overview of dynamic contrast-enhanced MRI in prostate cancer  
1029 diagnosis and management. *AJR Am. J. Roentgenol.* **198**, 1277-1288 (2012).
- 1030 88. Morkenborg, J., Pedersen, M., Jensen, F. T., Stodkilde-Jorgensen, H., Djurhuus, J.  
1031 C., Frokiaer, J. Quantitative assessment of Gd-DTPA contrast agent from signal  
1032 enhancement: an in-vitro study. *Magn. Reson. Imaging* **21**, 637-643 (2003).
- 1033 89. Beak, J. Y., Kang, H. S., Kim, Y. S., Jetten, A. M. Functional analysis of the zinc  
1034 finger and activation domains of Glis3 and mutant Glis3(NDH1). *Nucleic Acids Res.*  
1035 **36**, 1690-1702 (2008).
- 1036 90. Pang, I. H., Shade, D. L., Clark, A. F., Steely, H. T., DeSantis, L. Preliminary  
1037 characterization of a transformed cell strain derived from human trabecular  
1038 meshwork. *Curr. Eye Res.* **13**, 51-63 (1994).
- 1039 91. Meerbrey, K. L., et al. The pINDUCER lentiviral toolkit for inducible RNA  
1040 interference in vitro and in vivo. *Proc. Natl. Acad. Sci. USA* **108**, 3665-3670 (2011).

- 1041 92. Schindelin, J., et al. Fiji: an open-source platform for biological-image analysis. *Nat.*  
1042 *Methods* **9**, 676-682 (2012).
- 1043 93. Narlikar, L., Jothi, R. ChIP-Seq data analysis: identification of protein-DNA binding  
1044 sites with SISSRs peak-finder. *Methods Mol. Biol.* **802**, 305-322 (2012).
- 1045 94. Huang da, W., Sherman, B. T., Lempicki, R. A. Systematic and integrative analysis  
1046 of large gene lists using DAVID bioinformatics resources. *Nat. Protoc.* **4**, 44-57  
1047 (2009).
- 1048 95. Huang da, W., Sherman, B. T., Lempicki, R. A. Bioinformatics enrichment tools:  
1049 paths toward the comprehensive functional analysis of large gene lists. *Nucleic*  
1050 *Acids Res.* **37**, 1-13 (2009).
- 1051 96. Zhao, F., et al. Elimination of the male reproductive tract in the female embryo is  
1052 promoted by COUP-TFII in mice. *Science* **357**, 717-720 (2017).
- 1053 97. Kvale, M. N., et al. Genotyping Informatics and Quality Control for 100,000 Subjects  
1054 in the Genetic Epidemiology Research on Adult Health and Aging (GERA) Cohort.  
1055 *Genetics* **200**, 1051-1060 (2015).

1056  
1057

## 1058 **Acknowledgements**

1059 AMJ research was supported by the Intramural Research Program of the National Institute of  
1060 Environmental Health Sciences (NIEHS), the National Institutes of Health (NIH) [Z01-ES-100485].  
1061 The authors thank Laura Miller-de Graff for her outstanding assistance with breeding the knockout  
1062 mice. This work was supported in part by the National Eye Institute (NEI) grants R01 EY027004  
1063 (HC, EJ) EY022891 (KSN), EY028175 (KK), EY011721 (SWMJ), EY026220 EY026177 (GZ), and  
1064 EY12731291 (TB), the National Institute of Diabetes and Digestive and Kidney Diseases (NIDDK)  
1065 grant R01 DK116738 (HC, EJ), NEI P30 EY002162 core grant for vision research (UCSF,  
1066 Ophthalmology), Research to Prevent Blindness unrestricted grant (UCSF Ophthalmology), and  
1067 grants from That Man May See Inc., Brightfocus Foundation (G2019360), UCSF Academic  
1068 Senate Committee on Research (RAP grant), Marin Community Foundation-Kathlyn Masneri and  
1069 Arno Masneri Fund (KSN). SC is supported by grant from Department of Biotechnology,  
1070 Government of India grant (BT/PR32404/MED/30/2136/2019). SWMJ is an HHMI investigator  
1071 and received funding from the Precision Medicine Initiative at Columbia University.

1072

## 1073 **Contributions**

1074 HSK, RVB, and CB performed the preliminary characterization of *Glis1*-KO mice and initiated the  
1075 project; AB, RVB, CS, and GAJ analyzed AqH dynamics by MRI; RVB and CS carried out IOP  
1076 analysis; CS and HSK carried out TM cell culture, gene expression, and ChIP-Seq analysis; YK,  
1077 SK, YZ, and KSN performed ocular histological analysis; KSN, HC, JY, SC, and EJ, performed



1078 genetic association analyses; SG, performed the bioinformatic analyses; KO, analyzed GLIS1  
1079 transcriptional activity; GZ and TB, provided primary hTM cells and advice; KK, GC, SWMJ,  
1080 analyzed the SC and provided advice on the ocular histology data; RVB, CS, KSN and AMJ,  
1081 designed experiments; AMJ and KSN wrote the manuscript. RVB, CS, SG, TB, SK, HC, KK, SJ,  
1082 and EJ contributed and reviewed the manuscript; AMJ oversaw the characterization of the initial  
1083 mouse phenotype and molecular studies and KSN the eye structural and human genetic  
1084 analyses.

1085

#### 1086 **Competing interests**

1087 All authors declare no competing interests.

1088

#### 1089 **Figure Legends:**

1090

1091 **Figure 1. Anterior chamber is enlarged, IOP elevated, and AqH dynamics altered in**  
1092 ***Glis1*-KO mice. a.** Representative MRI images from 2.5 months old WT and *Glis1*-KO  
1093 mice showing increased size of the anterior chamber in *Glis1*-KO mice compared to WT.  
1094 The upper two images are *in vivo* images acquired by dynamic contrast enhancement in  
1095 the eye. The lower four images are coronal and sagittal sections of eyes from fixed  
1096 specimen stained with gadolinium using active staining. The anterior chamber is outlined  
1097 by the dotted line. Scale bar = 2 mm. **b and c.** Comparison of IOP levels in male (**b**) and  
1098 female (**c**) WT (squares) and *Glis1*-KO (circles) mice as function of age. Male mice  
1099 examined: at 1 and 2 months (n=3); 3 (n=5); 4 and 7 (n=8); 5 (n=6); 6, 11, and 12 months  
1100 (n=7). For female mice: 1 and 2 months (n=10); 3-7, 9 and 10 months (n=4); 8 (n=5); 11  
1101 and 12 months (n=3). IOP data from left and right eyes were combined and 4 IOP  
1102 measurements/eye/timepoint were performed; thus, total of 24-80 measurements at each  
1103 timepoint. Data are represented as means  $\pm$  SD. Statistical analyses were performed with  
1104 two-tailed Student's t-test. \* $p < 10^{-5}$ . Dotted line indicates basal IOP level in 1-3 months  
1105 old mice. **d.** AqH dynamics was examined by Gd-enhanced MRI over a 2 h period.

1106 Percent of Gd signal enhancement was determined and plotted. Left eye of 2 months-old  
1107 WT mice (n=3; black line) and *Glis1*-KO mice (n=4; red line) was treated topically with  
1108 saline and the right eye of *Glis1*-KO mice with Ripasudil (0.04%)(n=4; blue line). Data are  
1109 represented as means  $\pm$  SD). Statistical analyses were performed with two-tailed  
1110 Student's t-test. \* $p < 10^{-2}$ ; \*\* $p < 10^{-3}$ ; \*\*\* $p < 10^{-4}$ .

1111

1112 **Figure 2. Disruption of the ocular angle drainage structures in *Glis1*-KO mice. a,**  
1113 **c.** WT mice maintained in C57BL/6NCrl background showed a well-developed SC and  
1114 TM (\*) at both 3 and 6 weeks of age. **b.** *Glis1*-KO-C57BL/6NCrl eyes exhibit a  
1115 morphologically mature ocular drainage tissue at 3 weeks of age. The histological  
1116 assessment of the ocular angle at 3 weeks of age was performed on 6 WT and 6 *Glis1*-  
1117 KO eyes with similar results within each group. In contrast, by 6 weeks of age *Glis1*-KO  
1118 eyes exhibit a variable degree of focal TM degeneration, ranging from hypoplastic TM  
1119 characterized by substantial thinning of the TM (**d**), reduction in size of the Schlemm's  
1120 canal and associated TM causing partial collapse of the ocular drainage structures (**e**). **f.**  
1121 At 6 weeks of age a small proportion of mice (<10%) showed focal regions exhibiting  
1122 partial or complete collapse of the ocular drainage structures lacking TM and Schlemm's  
1123 canal. **a-f.** A magnified version of the image in the upper panel is shown in the lower  
1124 panel. Arrows show edges of the SC. IV, Iris vessel. The histological assessment of the  
1125 ocular angle at 6 weeks of age was performed on 10 WT and 15 *Glis1*-KO eyes with  
1126 similar results within each group. Scale bar = 50  $\mu$ m. Detailed measurement of the TM  
1127 area was performed on 5 eyes per experimental group, shown in Supplemental figures 5  
1128 and 6.

1129

1130 **Figure 3. GLIS1 is highly expressed in TM.** **a.** QPCR analysis of GLIS1 and MYOC  
1131 mRNA expression in human TM tissue, kidney (Ki), and liver (Li) (n=3; technical  
1132 replicates). Statistical analyses were performed with two-tailed Student's t-test. Data are  
1133 represented as means  $\pm$  SD. P-values are indicated above the bars. **b.** Comparison of  
1134 mouse GLIS1 RNA expression in several ocular tissues with that of kidney, a tissue in  
1135 which GLIS1 is highly expressed (n=3; distinct samples). Statistical analyses were done  
1136 with two-tailed Student's t-test. Data are represented as means  $\pm$  SD. P-values are  
1137 indicated above the bars. **c.** RNAscope *in-situ* hybridization with eye sections from 3-  
1138 month-old WT mouse showed that GLIS1 mRNA (yellow speckles) expression was  
1139 restricted to TM and CB. Dashed lines outline different cell compartments. Kidney (Ki),  
1140 Cornea (C), Retina (R), Ciliary Body (CB), Trabecular Meshwork (TM), Corneal Stromal  
1141 (CS), Iris (I), SC (SC). Scale bar = 50  $\mu$ m.

1142

1143 **Figure 4. Regulation of TM/glaucoma-related gene expression by GLIS1 in TM cells.**  
1144 **a.** Volcano plots of genes down-regulated (blue) and up-regulated (red) in HTM(shGLIS1)  
1145 and Dox-treated HTM(pIND-GLIS1) and TM5(pIND-GLIS1) cells (as determined by  
1146 DESeq2 at FDR 0.01). All other genes are in gray. Several genes associated with IOP,  
1147 glaucoma or ECM are indicated (yellow diamonds). The X-axis represents gene  
1148 expression log<sub>2</sub>-fold change (FC) and the Y-axis represents  $-\log_{10}$  (p-value). **b.** Heatmap  
1149 of the differential expression of several TM-, glaucoma-, ECM-related mRNAs in  
1150 HTM(shGLIS1) and HTM(Scr) (Control) cells; underlying data are rlog-transformed  
1151 quantification scores as reported by DESeq2 followed by row-scaling at FDR 0.01. Data

1152 shown are for HTM (Scr), shGLIS1#1, and shGLIS1#5 replicates 1 and 2. **c, d.** Heatmap  
1153 of the differential expression of several TM-, glaucoma-, ECM-related mRNAs in  
1154 HTM(pIND-GLIS1) cells (**c**) expressing Dox-inducible Flag-GLIS1-HA treated for 18 h  
1155 with or without Dox (Control) (n=2) and TM5(pIND-GLIS1) cells (n=3)(**d**). **e.** QPCR  
1156 analysis of several genes down-regulated in HTM(shGLIS1) compared to HTM(Scr) cells  
1157 (n=3, independent replicates). **f.** QPCR analysis (n=3, independent replicates) of several  
1158 genes induced by murine GLIS1 in TM5 cells expressing Dox-inducible Flag-GLIS1-HA.  
1159 Cells were treated for 18 h with or without Dox (+/- Dox). Data in **e** and **f** are represented  
1160 as means  $\pm$  SD. Statistical analyses were performed with two-tailed Student's t-test. P-  
1161 values are shown above the bars.

1162

1163 **Figure 5. GLIS1 regulates the transcription of a subset of TM/glaucoma-related**  
1164 **genes in HTM cells through its interaction with GLISBS.** **a.** Heatmap and ChIP-Seq  
1165 read density plot showing GLIS1 occupancy in TM5(pIND-GLIS1) cells treated for 18 h  
1166 with Dox (+Dox) compared to untreated cells (-Dox). Each line in the heatmap represents  
1167 an individual GLIS1 binding site. **b.** Pie chart showing the location of GLIS3-binding peaks  
1168 within specific regions of the genome. TSS proximal: -1 kb to transcription start site  
1169 (TSS); Upstream: -1 to -10 kb. **c.** Homer *de novo* and known motif analysis identified  
1170 GLIS-like binding sites (GLISBS) as the top consensus sequence motif. Binding sites for  
1171 transcription factors of the AP-1, FOX, and TEAD families were identified alongside GLIS  
1172 consensus motifs.

1173

1174 **Figure 6. Genome browser tracks of the *MYOC*, *CHI3L1*, *BMP2*, *FBN2*, *LOXL4*,**  
1175 ***MMP2*, *LTBP2*, *COL6A2*, *CYP1B1* and *ADAMTS10* genes (<https://genome.ucsc.edu/>)**  
1176 **showing *GLIS1* occupancy (ChIP-Seq) in TM5(pIND-*GLIS1*) cells expressing Flag-**  
1177 ***GLIS1*-HA. The AP-1, E-box, and NFκB binding sites in *MYOC* and the AP-1 and G/C-**  
1178 **rich SP1 binding sites in the *CYP1B1* proximal promoter region are indicated.**

1179

1180 **Figure 7. Regional plot at the *GLIS1* genomic region showing association with**  
1181 **glaucoma in the combined (GERA + UK Biobank) multiethnic meta-analysis. Top**  
1182 **SNP rs941125 is significantly associated with glaucoma after Bonferroni correction**  
1183 **( $p=4.73 \times 10^{-6}$ ).**

1184

1185

1186 **SUPPLEMENTARY INFORMATION**

1187 **Supplementary Figures 1-14**

1188 **Supplementary Tables 1-3**

1189

1190 **Source files:**

1191

1192 **Source file for imaging data in Figure 1a and c.**

1193

1194 **Source file for Figure 1b and b and Supplementary Figs. 3 and 4c**

1195

1196 **Source file for Figure 3a and b**

1197

1198 **Source file for Figure 4e and f**

1199

1200 **Source file for Supplementary Figure 1b, c and d**

1201

1202 **Source file for Supplementary Figure 2**

1203

1204 **Source file for Supplementary Figure 5**

1205

1206 **Source file for Supplementary Figure 6**

1207

1208 **Source file for Supplementary Figure 7**

1209

1210 **Source file for Supplementary Figure 10**

1211

1212 **Source file for Supplementary Figure 11**

1213

1214 **Source file for Supplementary Figure 12**

1215

1216 **Source file for Supplementary Figure 13**

1217

1218 **Source file for Supplementary Figure 14**

1219

1220

1221

1222

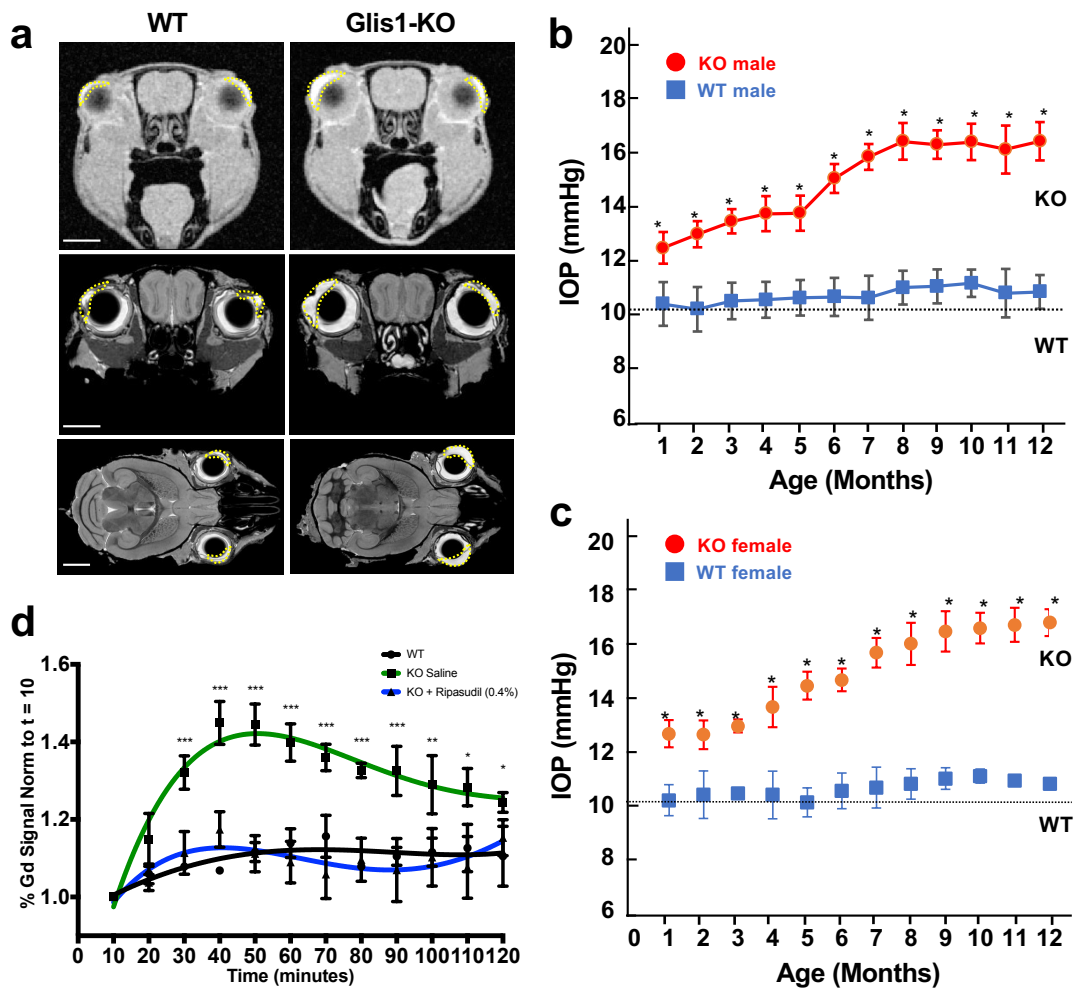

Figure 1



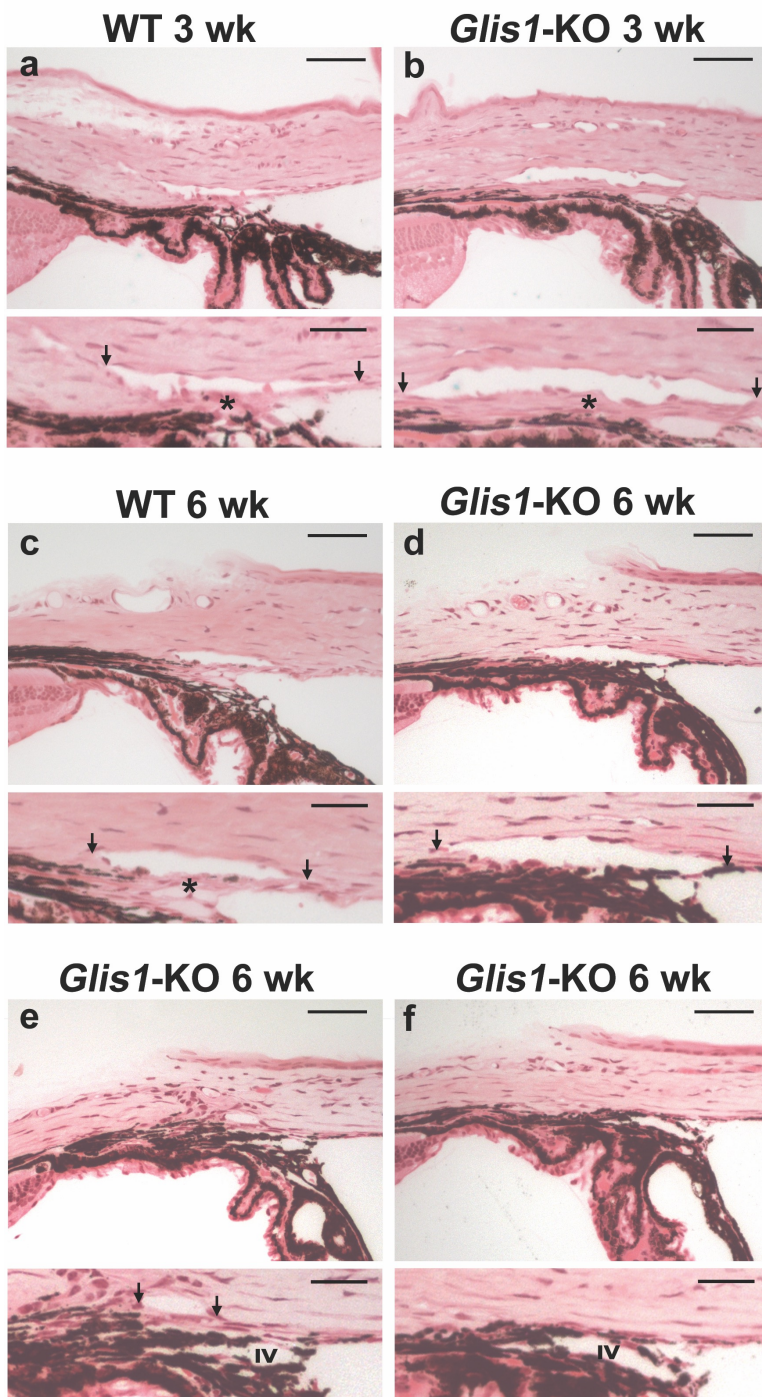

Figure 2



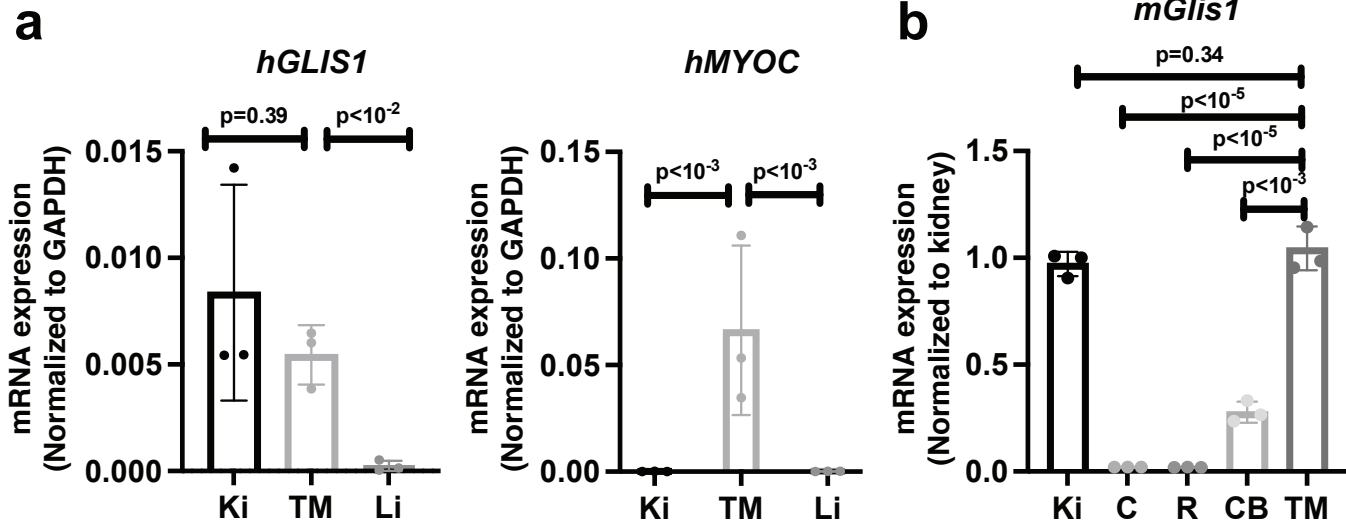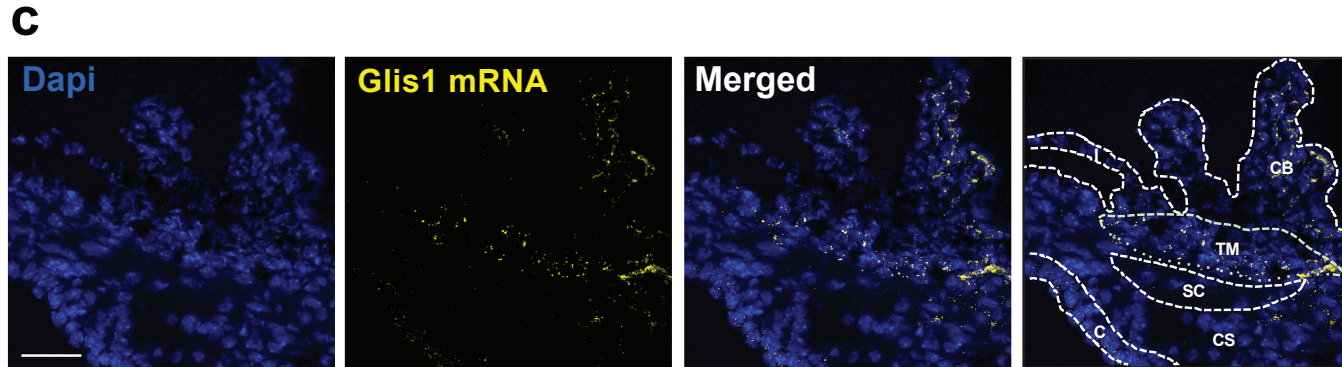

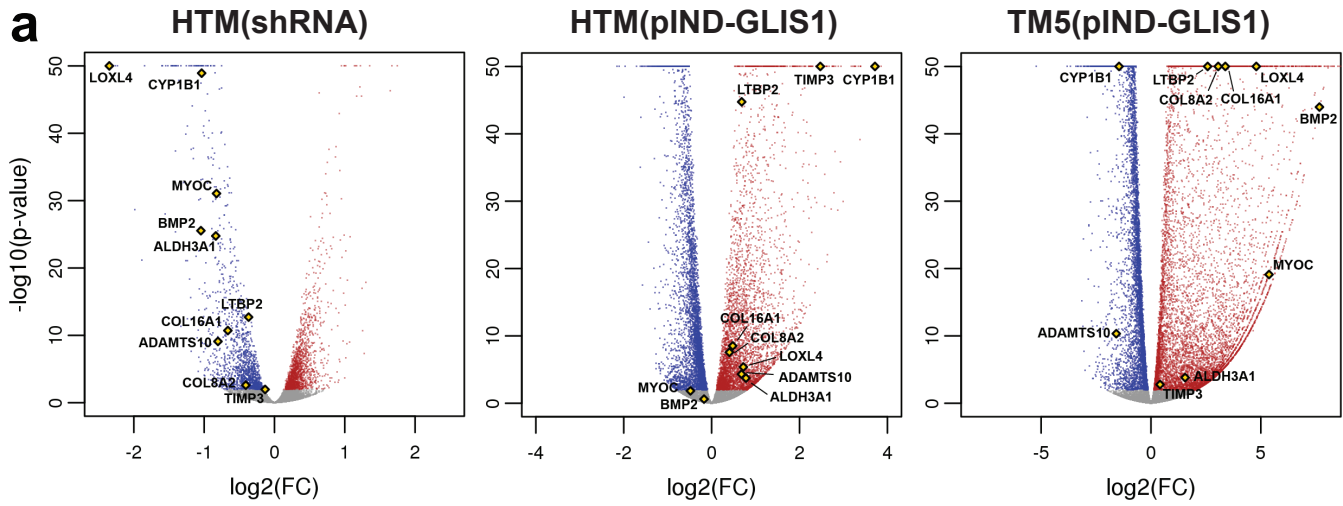

**b** HTM(shGLIS1) **c** HTM(pIND-GLIS1) **d** TM5(pIND-GLIS1)

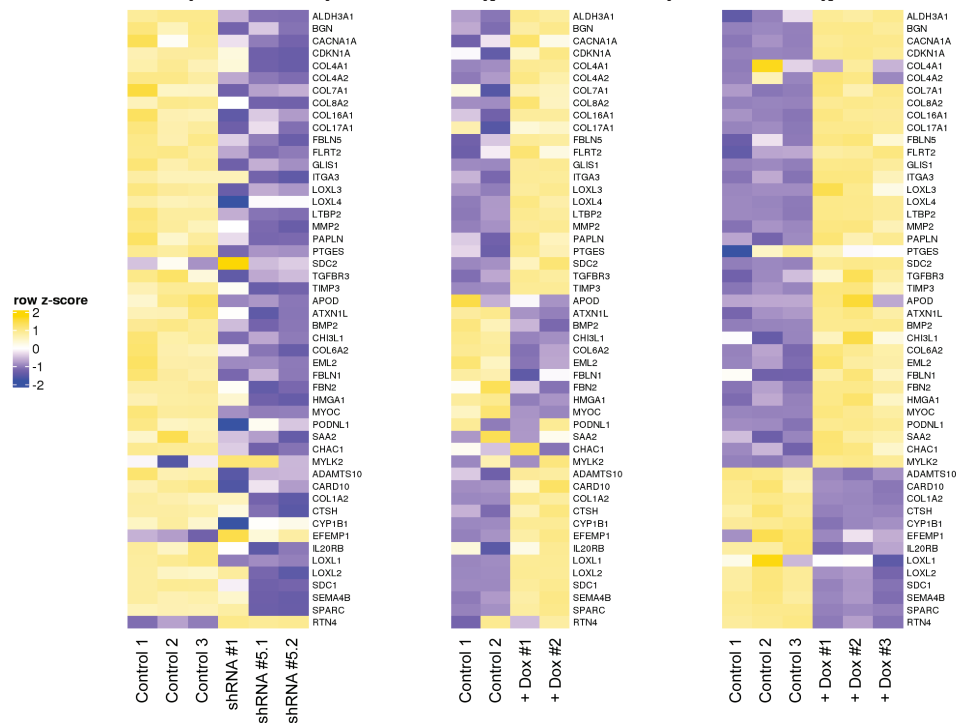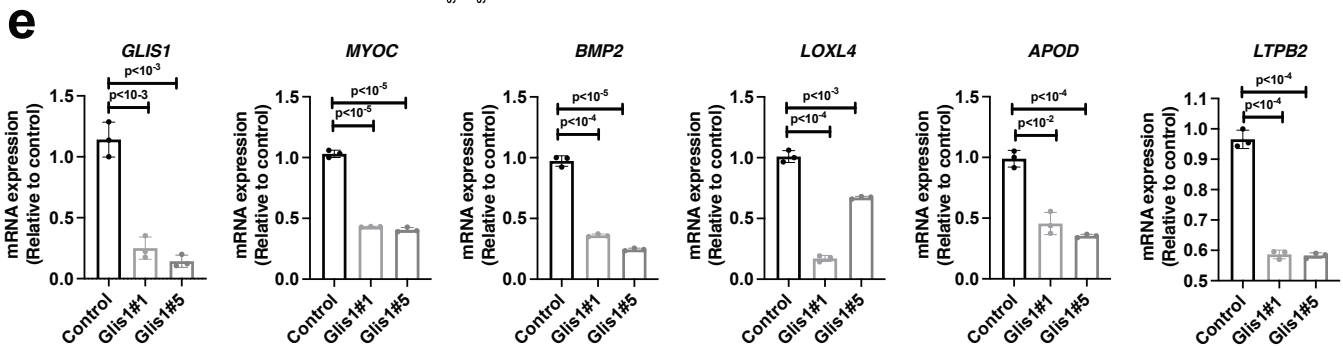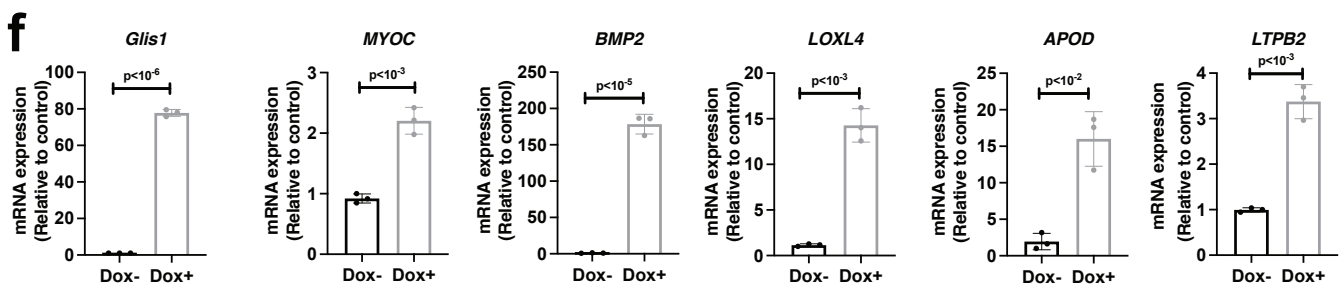

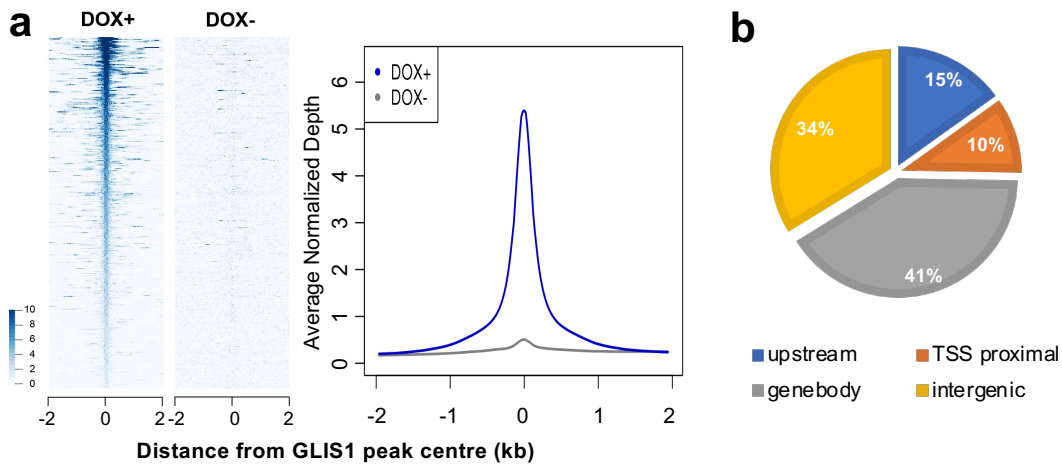

**c** Homer *de novo* Motif Analysis

| Motif | TF Name          | P-value | % of Peaks |
|-------|------------------|---------|------------|
|       | EBF1 (ZF)        | 1e-1302 | 71.79%     |
|       | Glis3/ZIC (ZF)   | 1e-982  | 60.59%     |
|       | ZIC3/GLIS (ZF)   | 1e-801  | 28.50%     |
|       | FRA1/AP-1 (bZIP) | 1e-700  | 8.53%      |
|       | TEAD (TEA)       | 1e-467  | 13.67%     |
|       | FOX (Forkhead)   | 1e-171  | 13.61%     |

Homer Known Motif Analysis

| Motif | TF Name         | P-value | % of Peaks |
|-------|-----------------|---------|------------|
|       | GLIS3 (ZF)      | 1e-1002 | 51.50%     |
|       | Atf3 (bZIP)     | 1e-694  | 9.88%      |
|       | Fra1 (bZIP)     | 1e-671  | 8.74%      |
|       | BATF (bZIP)     | 1e-664  | 9.54%      |
|       | AP-1 (bZIP)     | 1e-639  | 10.92%     |
|       | JunB (bZIP)     | 1e-636  | 8.88%      |
|       | EBF1 (ZF; GLIS) | 1e-543  | 32.94%     |
|       | Jun-AP1 (bZIP)  | 1e-487  | 5.39%      |
|       | Zic3 (ZF; GLIS) | 1e-479  | 21.63%     |
|       | TEAD3 (TEA)     | 1e-402  | 13.00%     |
|       | TEAD4 (TEA)     | 1e-330  | 11.93%     |
|       | FOX (Forkhead)  | 1e-148  | 6.02%      |

Figure 5

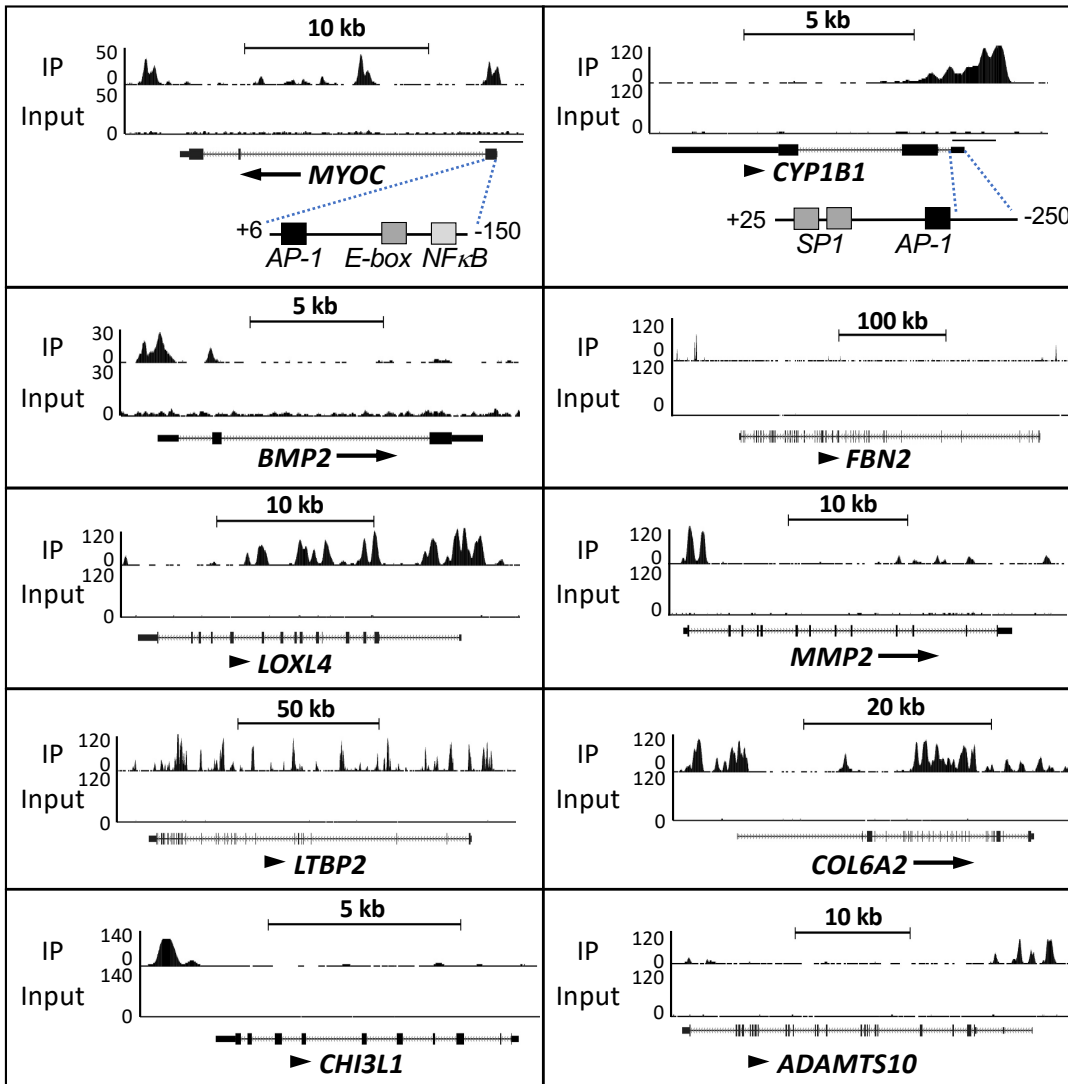

Figure 6

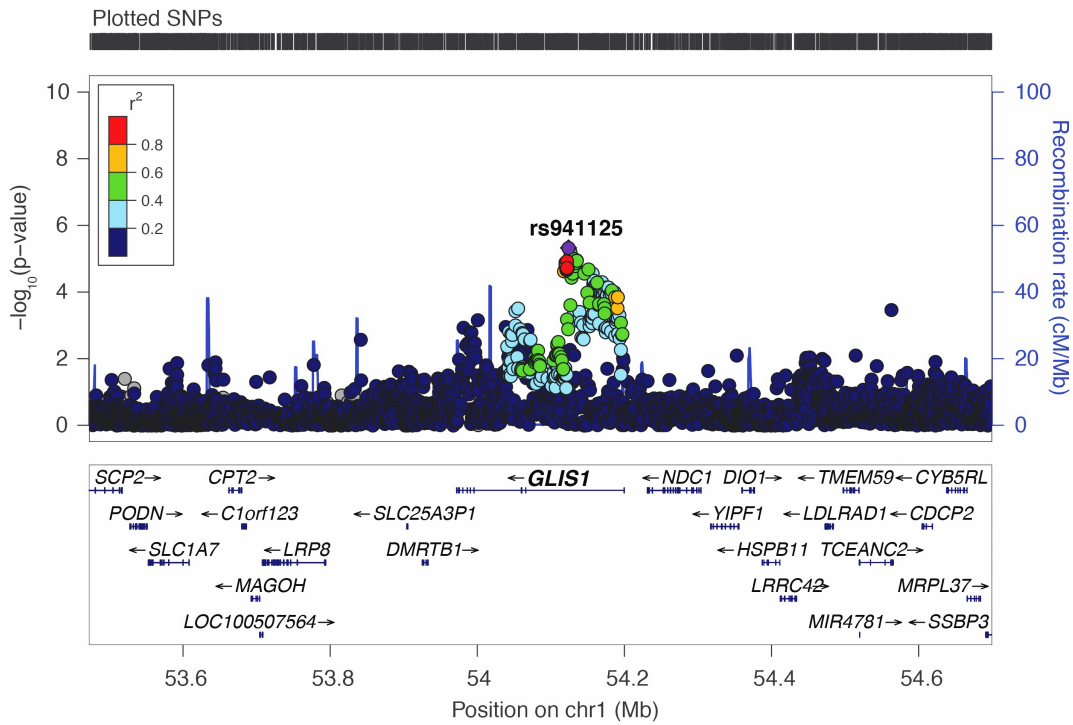

Figure 7
